# Supplementary material for: Assessment of agro-morphological, physiological and yield traits diversity among tropical rice
Source: PeerJ. 2021 Jul 19;9:e11752. doi: 10.7717/peerj.11752 (PMC8297474; doi:10.7717/peerj.11752)
Supplement: Supplemental Information 1 [file peerj-09-11752-s001.xlsx]

## Sheet: Sheet1
Metadata: Phenotypic variability in physiological (net photosynthesis (Pn), Stomata conductance (Cond), Transpiration rate (Tr), intrinsic Water use efficiency (iWUE), chlorophyll fluorescence (Fv'/Fm'), Electron transport rate (ETR), Total chlorophyll (Chl) and Carotenes (Caro)), agro-morphological traits (days to heading (DH, d), tiller number (TN, per plant), plant height (PHT, cm) and shoot d…
Year	Genotype	Replication	Pn	Cond	Tr	iWUE	Fv'/Fm'	ETR	Chl	Caro	DH	TN	PH	SHW	PL	SPN	GW	SF	GN	GY	HI
Year 1	12DS-15	1	30.4	1.9	13.6	2.23529	0.618	157.049	39.3336	6.39808	115	58	72	121.03	21.5	10	2.37	90.1639	103	103.64	0.461299
Year 1	12DS-15	2	30.2	1.73	14	2.15714	0.545	106.018	36.7214	5.18772	114	52	77	173.56	23	10.5	2.27	95.614	103	82.6	0.322455
Year 1	12DS-15	3	25	1.61	11.9	2.10084	0.551	154.215	32.945	5.84472	115	33	69	152.24	22.5	10.5	2.82	94.7826	112.5	69.25	0.312655
Year 1	12DS-15	4	23.9	0.425	7.66	3.1201	0.435	152.314	45.3099	7.4758	115	43	69	153.6	23.5	12.5	3.185	98.2609	141	80.78	0.344654
Year 1	12DS-15	5	28.5	0.764	11.3	2.52212	0.492	175.515	31.7083	4.15123	115	39	69	135.07	21	10.5	2.075	88.9	88.5	77.55	0.364735
Year 1	12DS-25	1	36.7	2.81	11.7	3.13675	0.531	222.936	42.9893	7.36819	116	51	85	141.66	24.5	10.5	2.335	90.33	105.5	100.44	0.41487
Year 1	12DS-25	2	37.5	2.06	13.9	2.69784	0.607	115.649	42.0025	6.87293	115	78	92	308.54	27	11	3.225	84.7458	152	189.82	0.380889
Year 1	12DS-25	3	28	1.5	12.9	2.17054	0.563	120.39	49.4762	7.49724	115	43	93	204.47	27.5	12	4.285	100	166.5	95.31	0.317933
Year 1	12DS-25	4	23.6	0.393	7.54	3.12997	0.465	152.373	32.9348	5.43339	117	58	80	222.91	25	13.5	3.03	98.0583	196.5	128.99	0.366553
Year 1	12DS-25	5	11.8	0.291	6.16	1.91558	0.411	119.417	32	1.70608	115	52	83	219.46	24.5	11	3.225	87.8049	120.5	88.78	0.288022
Year 1	75-1-127	1	34	1.66	12.5	2.72	0.579	171.948	41.6554	6.32597	126	32	65	99.83	24	11.5	2.645	98.4375	121.5	49.97	0.333578
Year 1	75-1-127	2	30.1	1.58	14.2	2.11972	0.572	125.061	38.1862	5.87997	124	54	71	232.5	24.5	12.5	3.43	91.2	170.5	112.15	0.325403
Year 1	75-1-127	3	32.3	2.02	13.9	2.32374	0.472	174.687	37.3488	5.8581	124	37	63	162.61	23.5	13	3.055	97.7099	161.5	51.84	0.241735
Year 1	75-1-127	4	21.3	0.519	7.28	2.92582	0.471	195.11	45.3992	7.41806	124	56	64	219.98	22	11.5	2.185	92.8	106.5	93.43	0.298108
Year 1	75-1-127	5	24.9	1.13	11.5	2.16522	0.548	150.494	30.4139	4.21253	131	23	61	119.22	21	11	1.825	0	102.5	77.8	0.394884
Year 1	Apo	1	33.5	1.73	11.1	3.01802	0.585	182.852	38.2993	5.77325	119	71	72	169.77	28.5	13.5	2.555	86.9159	144.5	123.05	0.420224
Year 1	Apo	2	30.5	1.55	11.2	2.72321	0.482	123.731	33.9227	4.79131	116	91	74	250.3	29.5	13	2.66	85.0467	203.5	161.08	0.39156
Year 1	Apo	3	28.8	1.75	13.8	2.08696	0.519	98.857	39.1878	6.61412	117	33	73.5	124.93	27	13.5	3.5	94.3396	209.5	78.4	0.38558
Year 1	Apo	4	22.9	0.582	11	2.08182	0.584	162.568	39.7485	7.29383	117	43	70	139.25	26.5	12	2.435	87.2881	143.5	96.53	0.409407
Year 1	Apo	5	27.7	0.775	11.7	2.36752	0.562	173.608	33.1618	5.30713	117	44	67	147.07	25.5	11	2.565	88.5	130.5	110.7	0.429453
Year 1	BR47	1	36.4	1.12	14.8	2.45946	0.59	124.843	42.8061	7.64298	140	70	76	231.8	22	12	1.375	14.1509	86	23.08	0.0905524
Year 1	BR47	2	40.4	2.53	14.5	2.78621	0.559	159.198	45.302	7.1117	118	57	85	217.28	26.5	13	2.77	55.6	128	44.6	0.170307
Year 1	BR47	3	31.4	0.705	11.6	2.7069	0.515	106.064	47.0449	7.31604	135	60	71	260.38	23.5	12	1.37	72.0339	82	65.82	0.201778
Year 1	BR47	4	32.1	0.651	12.1	2.65289	0.486	157.949	48.9631	8.42945	138	91	75	291.77	25	12.5	0.685	55.3	73	24.36	0.0770569
Year 1	BR47	5	34.2	0.706	11.4	3	0.493	169.936	50.9965	7.59434	138	72	81	298.2	25	12.5	1.375	70.9091	110.5	39.7	0.11749
Year 1	COL XXI	1	35.3	2.05	12	2.94167	0.518	166.008	39.9168	6.00618	137	47	70	168.41	28	16.5	3.05	96.9231	144	85.68	0.337203
Year 1	COL XXI	2	30.6	1.69	12.8	2.39062	0.534	218.919	45.6443	7.14896	137	41	92	155.32	29.5	14.5	3.525	77.23	145.5	88.23	0.362266
Year 1	COL XXI	3	28.6	1.18	12.5	2.288	0.486	126.757	47.8892	7.9342	134	58	69	195.15	29	13.5	3.235	96.4912	210.5	109.14	0.358671
Year 1	COL XXI	4	34.3	0.972	11.6	2.9569	0.534	111.845	45.4082	7.15643	137	45	70	152.39	25.5	12.5	1.575	75.5556	135	34.32	0.183814
Year 1	COL XXI	5	31.4	1.01	14.2	2.21127	0.582	188.119	40.2831	7.16198	139	67	61	191.13	23.5	13	1.455	69.33	109.5	56.34	0.227664
Year 1	CT18233	1	37.8	3.29	13.8	2.73913	0.548	236.048	22.88	3.04398	130	25	78	90.7	22.75	14.5	2.79	93.4959	133.5	42.06	0.316812
Year 1	CT18233	2	41.4	2.13	15.5	2.67097	0.495	188.227	51.8227	8.14546	125	32	89	148.11	26	17	4.965	92	231	66.13	0.308673
Year 1	CT18233	3	32.2	1.09	12	2.68333	0.414	116.662	43.2119	5.652	125	48	74	194.71	23	15	2.36	99.2593	127.5	80.59	0.292735
Year 1	CT18233	4	32.3	1.35	11.8	2.73729	0.479	174.41	54.7142	8.89	126	50	76	186.23	23.5	14	3.335	97.6562	160.5	63.16	0.253258
Year 1	CT18233	5	27.4	1.13	13.3	2.06015	0.572	130.919	30.1347	4.14553	139	25	70	71.18	23	13	2.495	80.4688	101	31.9	0.309468
Year 1	CT18237	1	42.1	3.01	14.4	2.92361	0.571	181.871	37.3306	5.81729	120	43	74	174.16	29	15	4.55	77.8	154.5	77.5	0.307955
Year 1	CT18237	2	37.2	2.14	15.3	2.43137	0.559	174.445	38.0179	6.48547	120	44	69	179.19	28	14	3.665	96.2963	161	105.51	0.370601
Year 1	CT18237	3	30.2	1.13	13	2.32308	0.584	168.285	46.5419	7.57077	125	57	71	203.59	27.5	14	2.59	80	120.5	69.5	0.254495
Year 1	CT18237	4	25.7	0.528	8.3	3.09639	0.502	154.75	25.9851	1.69511	116	26	75	117.54	28	13	2.735	100	112.5	36.75	0.238188
Year 1	CT18237	5	27.7	0.748	9.11	3.04061	0.507	174.969	43.95	6.80264	125	59	65	220.91	27.25	12	2.39	66.3	127	77.4	0.259462
Year 1	CT18244	1	23.6	0.546	10.6	2.36	0.55	157	67.6878	13.3454	126	70	62	251.76	27.5	12.5	3.595	88.9	161.5	89.5	0.262263
Year 1	CT18244	2	27.3	1.5	13.8	1.97826	0.607	136.062	37.6404	7.07892	122	46	78	139.97	29	15.5	4.955	84.8	239.5	99.01	0.414302
Year 1	CT18244	3	36.1	1.51	14	2.57857	0.58	195.669	28.2075	5.11719	119	52	76	246.35	28	15.5	5.505	89.5238	221.5	144	0.3689
Year 1	CT18244	4	32.9	1.3	8.64	3.80787	0.578	166.284	46.5905	7.71739	122	44	64	188.22	26.5	12	2.94	87	167.5	98.53	0.343609
Year 1	CT18244	5	33.3	1.41	12.1	2.75207	0.481	99.741	33.9804	5.20102	122	48	67	194.2	24.5	11.2	2.32	94	134.2	94.3	0.326863
Year 1	CT18245	1	34	1.65	13.9	2.44604	0.574	196.701	38.114	6.44683	126	40	74	165.36	29	10.5	2.39	93.0435	119.5	76.62	0.316638
Year 1	CT18245	2	29.8	1.15	12	2.48333	0.448	160.623	41.0349	6.34371	121	39	81	151.31	25.5	11.5	1.57	93.578	83	53.28	0.260423
Year 1	CT18245	3	36.3	1.54	14.1	2.57447	0.39	162.25	27.6446	4.39025	121	78	93	286.95	24.5	10	1.93	96	107	83.33	0.225046
Year 1	CT18245	4	31.1	0.608	8.46	3.67612	0.404	154.204	52.9509	8.69754	125	52	71	171.52	23.5	10	1.525	80	85.5	53.51	0.237791
Year 1	CT18245	5	28.1	0.623	10.8	2.60185	0.51	175.25	35.851	4.33519	121	58	74	232.08	28	11	1.99	77.8	103.5	77.4	0.250097
Year 1	CT18247	1	39.4	2.67	13.9	2.83453	2.19	1106.79	40.5159	7.15582	87	48	76	165.3	24.5	12	2.685	93.7008	134	89.24	0.350593
Year 1	CT18247	2	33.1	0.889	12.8	2.58594	0.495	155.743	30.6446	4.34279	87	35	76	128.29	24	10	1.085	84.9624	78.5	57.09	0.307962
Year 1	CT18247	3	41.9	1.68	13.6	3.08088	0.526	93.636	38.5797	5.34569	96	45	78	191.44	24.5	11.5	3.525	96	167	93.65	0.328493
Year 1	CT18247	4	26.5	0.7	8.39	3.15852	0.558	150.682	43.9841	8.05702	96	48	71	183.55	24	14	2.795	94.8148	193.5	113.05	0.381153
Year 1	CT18247	5	32.1	0.718	11.5	2.7913	0.531	124.053	27.6602	3.19044	95	43	73	157.43	22.5	14	3.9	92.5	211	78.6	0.333009
Year 1	CT18372	1	28.3	1.17	10.5	2.69524	0.328	114.567	28.0911	4.25447	140	74	62	227.18	26.5	13.5	1.26	20.7547	97	37.93	0.143073
Year 1	CT18372	2	27.3	0.578	9.92	2.75202	0.491	179.491	30.1224	4.51342	137	29	68	106.57	20	12.5	1.42	80.1802	89	24.69	0.1881
Year 1	CT18372	3	36.3	1.49	12.6	2.88095	0.566	115.671	40.6233	7.38814	138	67	45	214.73	20	14	1.17	62.0438	94.5	47.74	0.181887
Year 1	CT18372	4	32.3	0.987	9.19	3.51469	0.464	177.086	36.2162	5.21157	134	74	70	162.38	22	13	1.395	42.4528	95	54.3	0.2506
Year 1	CT18372	5	22.2	0.453	9.12	2.43421	0.487	184.337	33.683	4.80461	137	46	61	140.27	23	13.5	1.82	0	132	55.9	0.284957
Year 1	CT18593	1	29.7	0.792	10.5	2.82857	0.55	148.692	44.721	6.43577	155	57	47.5	185.08	24.6	13	1.56	9.55	89	22.69	0.109207
Year 1	CT18593	2	36	1.47	13.4	2.68657	0.538	187.444	36.8955	5.52876	158	43	54	177.76	23	13.5	1.42	9.7561	88.9	26.49	0.129694
Year 1	CT18593	3	34.9	1.31	13	2.68462	0.506	123.173	33.0908	4.69729	158	66	48	212.47	26.5	17.8	1.23	8.33	97	21.18	0.0906484
Year 1	CT18593	4	23.2	0.563	8.44	2.74882	0.474	165.062	28.0019	4.32532	160	22	44	55.14	25.6	15.8	1.17	5.76923	90	13.23	0.193506
Year 1	CT18593	5	24.3	0.64	9.12	2.66447	0.378	128.771	45.1109	6.09099	158	76	48	272.13	22	13.5	1.26	10.6557	89	21.84	0.0742933
Year 1	CT18614	1	20.7	0.533	9.82	2.10794	0.488	153.575	43.2119	6.46533	126	72	75	147.71	27	14.5	1.78	88.8889	107.5	95.76	0.393313
Year 1	CT18614	2	29.1	1.37	11.9	2.44538	0.596	162.071	33.4977	5.18959	138	59	76	181.76	28	13	2.635	54.5455	135.5	83.57	0.314966
Year 1	CT18614	3	25.8	0.945	10.6	2.43396	0.495	216.982	49.0817	7.00435	134	75	62	258.53	28	15.5	1.67	70.4762	123	62.06	0.193581
Year 1	CT18614	4	29.1	0.657	9	3.23333	0.511	140.616	48.4285	8.40388	139	80	70	223.15	27	12	2.355	58.3333	123.5	52.65	0.190899
Year 1	CT18614	5	15.6	0.383	8.15	1.91411	0.484	129.485	31.5172	4.53417	134	34	67	139.62	23	12.5	1.87	75.5396	101.5	39.51	0.220566
Year 1	CT18615	1	25.2	0.605	9.19	2.74211	0.483	203.072	37.5058	6.14915	112	56	82	160.17	25	10	3.065	94.4444	157	117.46	0.423081
Year 1	CT18615	2	24.9	1.96	14	1.77857	0.534	188.484	31.3884	5.82342	116	18	86	127.21	31	11	2.275	93.75	116.5	41.01	0.243788
Year 1	CT18615	3	35.3	1.43	12.9	2.73643	0.487	129.14	27.9747	3.864	111	90	93	306.25	26	13	3.27	88.2353	193.5	186.13	0.378021
Year 1	CT18615	4	32.3	1.1	9.96	3.24297	0.51	175.054	28.0302	4.14778	135	41	76	128.6	24	11.5	1.255	86.4078	83	29.19	0.184993
Year 1	CT18615	5	20.3	0.405	8.22	2.46959	0.52	144.751	39.8581	5.68436	125	57	81	206.55	29.5	16	4.05	77.4	182	55.6	0.212092
Year 1	CT19561	1	32.6	0.746	12	2.71667	0.45	145.23	30.7396	4.83806	125	65	65	157.38	23	10.5	1.495	77.7778	93	44.69	0.221161
Year 1	CT19561	2	34.1	1.36	13.9	2.45324	0.565	140.646	29.0191	3.92941	119	38	64	124.15	24.5	10	2	99.1597	97.5	43.94	0.261408
Year 1	CT19561	3	32.7	1.21	12.9	2.53488	0.458	151.891	30.4027	3.79726	119	37	66	113.78	24.5	9	2.095	93.2039	104.5	52.17	0.314372
Year 1	CT19561	4	33	0.744	8.74	3.77574	0.46	165.93	38.5764	5.50442	123	103	70	211.2	26	10.5	2.225	89.4231	117.5	100.91	0.323315
Year 1	CT19561	5	15.3	0.632	8.8	1.73864	0.385	157.41	20.5854	3.0658	137	20	51	69.28	18	9	1.72	68.3333	77.8	60.26	0.465184
Year 1	CT6510	1	34.8	1.52	12.1	2.87603	0.529	165.151	32.3571	5.60884	153	60	72	177.34	19.5	9.5	0.405	0	47.5	24.34	0.120686
Year 1	CT6510	2	31.3	1.59	13.3	2.35338	0.621	131.104	31.9603	4.33411	146	77	84	273.29	23.5	13	1.615	79.3388	56.5	43.56	0.137478
Year 1	CT6510	3	29.8	1.21	11.9	2.5042	0.558	137.306	28.5716	5.00577	154	55	43	199.03	22.1	18	1.11	50.4348	66.7	26.73	0.1184
Year 1	CT6510	4	31.6	0.929	10.4	3.03846	0.508	137.242	30.8956	4.7054	153	72	64	211.44	24.1	12	1.62	75	77.3	48.98	0.188081
Year 1	CT6510	5	19.7	0.442	9.67	2.03723	0.479	165.585	30.3643	3.511	154	98	64	267.88	20	12.5	1.29	54.1985	129.5	40.49	0.131303
Year 1	CT6946	1	27.8	1.42	14.2	1.95775	0	185.36	46.8324	8.60399	126	36	72	121.97	26	12	2.98	92.3729	136.5	78.5	0.39158
Year 1	CT6946	2	31.8	1.14	12.9	2.46512	0.569	225.452	35.3084	5.62466	124	29	79	128.7	27	13	3.04	91.6667	131	43.59	0.253004
Year 1	CT6946	3	38.5	1.77	13.1	2.93893	0.601	141.756	43.2809	6.3458	132	52	72	189.71	25	11	2.04	90.8333	147.5	66.71	0.260159
Year 1	CT6946	4	25.2	0.686	8.62	2.92343	0.519	180.155	30.6515	4.75543	126	39	74	152.08	25.5	12.5	2.84	94.8529	129	47.55	0.238191
Year 1	CT6946	5	22	1.03	10.8	2.03704	0.529	144.033	31.1081	4.53249	142	42	73	181.84	26.5	12.5	1.86	75.8929	162.5	49.57	0.214209
Year 1	FED 2000	1	33.9	3.42	12.5	2.712	0.545	171.614	37.7263	6.02551	148	61	95	220.8	25.5	10.5	1.68	87.6106	102.5	60.32	0.21457
Year 1	FED 2000	2	35.8	1.5	13.5	2.65185	0.558	204.604	37.446	5.07565	138	75	91	236.08	25.5	12.5	1.81	82.963	102.5	84.38	0.263309
Year 1	FED 2000	3	37.1	1.42	14.3	2.59441	0.613	187.046	29.8895	3.99485	139	120	96	406.22	28.5	13	1.72	40.9091	168	56.3	0.121724
Year 1	FED 2000	4	36.1	1.26	10.5	3.4381	0.527	151.947	37.3861	5.77311	143	73	89	192.42	28	12.5	1.96	50.8475	108.5	39.19	0.169207
Year 1	FED 2000	5	26.5	0.701	11.6	2.28448	0.438	126.775	29.6114	4.16792	144	63	80	224.18	23	13	1.4	55.3	74	55.7	0.199014
Year 1	FEDE 21	1	25.2	0.615	10.1	2.49505	0.568	204.964	56.4887	9.12035	120	81	80	284.29	23.5	14	1.38	89.9083	137.5	55.33	0.162917
Year 1	FEDE 21	2	34	1.79	13.1	2.59542	0.567	204.983	41.5096	6.8306	120	55	88	183.74	25	13.5	3.01	97.2603	166.5	122.87	0.400737
Year 1	FEDE 21	3	23	0.756	10.1	2.27723	0.535	132.675	33.0501	5.28208	135	44	88	209.24	25	14.5	3.415	85.8333	175	89.89	0.300505
Year 1	FEDE 21	4	24.1	0.489	7.38	3.26558	0.519	140.011	46.1531	7.81454	125	54	78	216.14	24	14	2.16	78.3019	152.5	83.66	0.279053
Year 1	FEDE 21	5	35.8	0.978	10.3	3.47573	0.513	112.95	35.8397	4.96938	134	69	90	294.47	24	11.5	2.525	79.4	140.5	87.3	0.228672
Year 1	FED 473	1	34	1.81	10.5	3.2381	0.542	130.508	30.7012	5.02405	120	73	76	232.94	24.25	10.5	3.035	96.1905	130	135.36	0.367526
Year 1	FED 473	2	37.2	1.3	14.2	2.61972	0.548	199.796	26.2916	3.51316	120	47	73	162.3	25	11	3.62	95.2381	135	96.44	0.372729
Year 1	FED 473	3	41	1.65	13.6	3.01471	0.538	128.144	39.05	5.72502	117	40	64	126.15	20.5	9.5	1.715	88.4956	84.5	52.08	0.292207
Year 1	FED 473	4	35.4	1.37	8.84	4.00452	0.464	133.102	37.2233	4.99465	123	46	81	161.36	25	11	1.88	92.4528	79	72.45	0.309867
Year 1	FED 473	5	26.7	0.795	10.3	2.59223	0.448	138.858	42.9316	5.37118	119	54	82	171.63	22	11.5	2.52	91.1504	115.5	67.92	0.283532
Year 1	FED CARE	1	33.2	2.35	11.8	2.81356	0.6	191.715	43.2605	6.37583	115	58	89	176.81	27.5	12	3.1	95	148	89.03	0.334901
Year 1	FED CARE	2	34.4	1.4	12.5	2.752	0.469	161.073	35.3458	5.01494	114	69	79	200.45	23.5	12	3.07	84.466	161	113.13	0.360769
Year 1	FED CARE	3	31.6	1.52	12.5	2.528	0.572	167.594	39.2546	5.47661	114	65	85	206.37	22	14.5	3.055	92.3077	142	130.71	0.387771
Year 1	FED CARE	4	29.4	0.73	8.21	3.581	0.487	175.566	38.1321	4.90033	115	56	71	163.42	21.5	11.5	1.62	94.4	89.5	85.47	0.343405
Year 1	FED CARE	5	22.4	0.4	8.48	2.64151	0.406	164.468	40.8992	5.98721	117	70	72	188.7	25.5	9	1.885	90.4	87	90.5	0.32414
Year 1	HHZ 12	1	22.3	0.895	10.8	2.06481	0.464	136.704	32.1718	5.41662	122	55	82	192.86	24.5	14	3.185	92.8571	175	105.07	0.352667
Year 1	HHZ 12	2	37.8	1.42	13.8	2.73913	0.493	175.769	40.0807	6.18515	119	62	87	209.49	24	13	2.575	81.1881	119.5	112.73	0.349854
Year 1	HHZ 12	3	35.4	1.75	12.8	2.76562	0.502	144.233	31.2346	4.12741	126	44	85	205.44	25	14	3.09	95.2941	166	66.98	0.24587
Year 1	HHZ 12	4	29	0.702	9.36	3.09829	0.501	189.068	108.84	6.53279	131	67	83	198.12	22.5	12.5	1.65	66.6667	105	55.83	0.219846
Year 1	HHZ 12	5	28.1	0.578	10.1	2.78218	0.398	111.147	16.5443	2.04955	126	40	89	172.6	24.5	16	2.135	88.4	144	77.3	0.309324
Year 1	HHZ 1	1	24	1.3	9.3	2.58065	0.578	131.637	23.0791	3.85159	115	61	78	108.22	23	10.5	2.285	175.455	112	81.73	0.430271
Year 1	HHZ 1	2	36	2.17	13.4	2.68657	0.572	132.556	40.0865	6.23966	112	41	82	139.61	25	12.5	2.965	90.3704	109	74.24	0.347159
Year 1	HHZ 1	3	29.3	1.39	14.2	2.06338	0.54	173.784	45.1482	6.83245	115	32	73	120.63	20.5	11	1.86	90	86	46.62	0.278744
Year 1	HHZ 1	4	28.9	0.765	8.6	3.36047	0.477	93.279	42.8221	6.39033	116	58	63	193.24	26.5	12.5	2.075	43.4783	116	21.65	0.100749
Year 1	HHZ 1	5	24.7	1.07	10.9	2.26606	0.515	132.768	34.627	5.457	118	32	82	138.81	23	12	1.53	100.5	81	66.5	0.3239
Year 1	IR04A115	1	28.4	0.784	10.3	2.75728	0.479	190.373	26.9201	4.35801	137	126	65	278.59	24.5	14.5	1.045	44.3	132	42.56	0.132524
Year 1	IR04A115	2	28.5	1.16	14.5	1.96552	0.55	166.8	32.5877	5.17503	137	85	71	164.91	27	13.5	2.495	44.6	138.5	55.7	0.252482
Year 1	IR04A115	3	36.3	1.55	13.1	2.77099	0.57	101.932	25.3726	3.32734	141	120	68	337.94	26.5	11	1.735	80.1587	111	54.83	0.139598
Year 1	IR04A115	4	35	1.31	9.39	3.72737	0.548	187.954	38.8375	5.96351	141	69	68	180.95	25.5	13	1.275	53.5088	111	42.73	0.191032
Year 1	IR04A115	5	25.2	0.9	9.02	2.79379	0.437	168.531	35.5097	5.07584	138	144	67	374.18	26.5	12	1.245	65.1	93.5	45.3	0.107991
Year 1	IR05F102	1	20.7	0.374	8.03	2.57783	0.469	115.045	29.6759	5.04274	123	43	68	180.3	27.5	10.5	1.7	181.188	89.5	72.08	0.285601
Year 1	IR05F102	2	26.4	0.957	12.8	2.0625	0.651	124.681	29.0496	4.40254	112	80	75	296.79	32.5	11.5	2.795	66.5	133	101.42	0.25469
Year 1	IR05F102	3	20.7	0.374	8.03	2.57783	0.469	115.045	50.3738	7.8141	117	108	74	368.12	30	13	3.385	47	139	91.75	0.199513
Year 1	IR05F102	4	22.6	0.391	7.08	3.19209	0.869	142.744	36.8312	5.3578	114	74	85	278.15	31	11	3.435	80.5825	149.5	136.55	0.329274
Year 1	IR05F102	5	28.7	0.854	10.6	2.70755	0.507	170.113	28.2166	4.71125	125	66	72	267.78	27.5	10	1.265	66.4	124.5	98.4	0.26872
Year 1	IR05N412	1	35.2	2.25	12.5	2.816	0.585	147.166	24.6628	3.84883	125	59	58	143.37	19	11	1.435	77.5194	79.5	63.2	0.30595
Year 1	IR05N412	2	35.2	1.85	12.6	2.79365	0.58	159.815	46.0309	7.59257	117	41	71	163.72	21.5	11	1.9	82.5688	86.5	56.01	0.254904
Year 1	IR05N412	3	34.3	1.3	12.7	2.70079	0.583	117.53	21.1936	3.33724	118	65	54	194.7	20.5	10	1.9	67.5	76	111.79	0.364743
Year 1	IR05N412	4	19.3	0.847	9.14	2.1116	0.472	173.077	28.7265	4.48874	124	35	65	106.78	23.5	12	2.64	90.4	112	56	0.344023
Year 1	IR05N412	5	24.8	0.777	12.2	2.03279	0.413	125.658	26.8827	3.59031	124	47	62	153.95	21.5	11.5	2.37	66.7	107.5	88.7	0.365547
Year 1	IR06N155	1	28.8	0.841	11.1	2.59459	0.602	221.641	35.3944	5.80436	143	75	66	298.48	24	9	0.66	44.3	105.5	24.6	0.0761421
Year 1	IR06N155	2	15.5	0.606	9.65	1.60622	0.51	205.518	38.9119	5.91613	142	78	74	327.19	24	11	1.005	60	124.5	27.02	0.0762824
Year 1	IR06N155	3	36.6	1.18	13.5	2.71111	0.552	160.887	42.0928	6.22882	144	102	69	442.8	27.5	12	0.715	46.6	127.5	35.62	0.0744534
Year 1	IR06N155	4	36.1	1.22	9.26	3.89849	0.639	161.363	38.0835	5.89499	146	105	69	309.67	17.5	8	0.22	46.3	50.5	21.64	0.0653165
Year 1	IR06N155	5	19.6	0.397	7.78	2.51928	0.479	193.242	28.8658	2.9662	150	106	67	420.96	22	11	0.485	56.4	59.5	28.98	0.0644086
Year 1	IR07F102	1	24.3	0.887	10.7	2.27103	0.55	170.961	35.2914	5.99445	113	36	85	215.59	25.5	12.5	2.81	87.156	207	90.34	0.295296
Year 1	IR07F102	2	35.6	2	12.9	2.75969	0.514	191.594	25.2652	4.14447	112	49	98	230.46	26.5	12.5	3.43	100	173.5	114.77	0.332445
Year 1	IR07F102	3	35.5	1.56	12.6	2.81746	0.57	117.94	40.5105	5.94238	120	36	106	164.32	24	14	2.03	90.1515	100.5	61.25	0.271534
Year 1	IR07F102	4	24.5	0.404	7.25	3.37931	0.431	194.616	43.6946	7.84106	113	59	100	247.2	25	13	3.19	79.8507	168.5	124.21	0.334428
Year 1	IR07F102	5	23.4	0.645	9.31	2.51343	0.415	139.752	33.0375	4.05407	114	45	110	193.27	24	13	2.74	88.6	144.5	110.4	0.363553
Year 1	IR07F287	1	30.2	1.32	12.4	2.43548	0.563	144.428	46.1281	7.21679	90	84	68	160.3	20.75	10	2.14	87	137	156.68	0.49429
Year 1	IR07F287	2	30.9	0.934	14.7	2.10204	0.45	134.5	46.4672	7.17665	90	101	68	136.69	21.5	11.5	2.45	70.4	147.5	131.33	0.490001
Year 1	IR07F287	3	34.1	1.64	14.1	2.41844	0.538	135.035	46.5024	7.25433	88	76	66	150.29	20	10	1.59	80.7692	144	129.87	0.463557
Year 1	IR07F287	4	25.7	0.51	7.7	3.33766	0.477	197.407	46.3882	7.52765	90	63	60	134.17	23	12.5	1.7	78.0303	183	86.81	0.392841
Year 1	IR07F287	5	24.3	0.768	8.43	2.88256	0.483	179.056	44.8994	6.50396	90	47	60	110.89	22	12	1.91	69.8	129	112.5	0.503604
Year 1	IR07K142	1	18.4	0.385	7.89	2.33207	0.495	208.351	45.4478	8.66662	87	85	62	174.94	20	14	3.61	81.7391	230	148.33	0.458842
Year 1	IR07K142	2	39.7	1.57	13.8	2.87681	0.628	113.25	40.4289	7.71991	87	36	67	69.68	22.5	13.5	2.56	96	201.5	81.12	0.537931
Year 1	IR07K142	3	43.5	2.22	14.1	3.08511	0.542	227.857	45.3528	7.7778	87	85	68	179.73	18	12	1.895	76.9231	136.5	135.46	0.429773
Year 1	IR07K142	4	28.1	0.614	7.93	3.54351	0.437	151.859	59.8502	10.4274	87	78	67	168.27	18	9.5	1.88	85.8407	128	131.69	0.439025
Year 1	IR07K142	5	19.6	0.299	7.44	2.63441	0.455	138.435	54.8836	8.03415	87	75	58	148.62	14.5	9	1.035	56.4	63	112.4	0.430618
Year 1	IR08A172	1	35.3	1.32	11.8	2.99153	0.541	159.282	40.0887	6.33936	87	52	78	86.24	21	12.5	1.855	88.5	140.5	98.4	0.532929
Year 1	IR08A172	2	40.6	2.16	15	2.70667	0.581	114.664	53.1508	8.5035	87	84	64	145.67	20	11.5	3.305	74.7899	224.5	122.23	0.456252
Year 1	IR08A172	3	36.1	1.14	13.4	2.69403	0.495	122.204	32.6465	5.8248	87	71	62	132.64	22	15	2.755	95.1613	210	96.79	0.421872
Year 1	IR08A172	4	35.9	1.25	10.97	3.27256	0.509	148.721	52.2093	7.94628	87	70	67	99.36	24.5	12	2.965	89.1473	262	113.5	0.533214
Year 1	IR08A172	5	30.1	1.36	15	2.00667	0.518	145.502	38.2134	5.84279	87	52	60	116.42	22	11.5	2.655	77.5	112.2	121.2	0.510058
Year 1	IR08N136	1	38.3	1.84	10.2	3.7549	0.532	189.986	49.6039	8.01436	89	92	64	205.26	23.5	13.5	3.525	87.5	194.5	137.95	0.401941
Year 1	IR08N136	2	36.3	2.36	14.1	2.57447	0.681	94.131	39.5665	6.2345	85	79	60	145.4	23	11.5	2.41	78.5	160	88.9	0.379428
Year 1	IR08N136	3	45.9	2.28	13.9	3.30216	0.546	182.736	46.3294	8.36023	89	43	68	110.68	22	11.5	3.53	80	193.5	71.8	0.393468
Year 1	IR08N136	4	41.5	1.57	8.54	4.85948	0.566	170.023	50.4823	8.43079	89	49	63	111.72	23	11.5	2.14	80.9524	151	88.34	0.441568
Year 1	IR08N136	5	16.8	0.414	7.16	2.34637	0.51	206.595	42.5788	5.98969	89	45	74	126.94	17.5	10	1.565	66.1157	100	71.26	0.359536
Year 1	IR09A130	1	36.9	1.16	13.6	2.71324	0.595	170.078	33.8469	4.94422	95	47	70	122.46	23	13	3.365	92.638	243	95.25	0.437509
Year 1	IR09A130	2	28.6	1.42	13.8	2.07246	0.547	131.144	47.0188	8.53779	93	85	74	171.42	20	12.5	2.43	95.8333	154.5	169.66	0.49742
Year 1	IR09A130	3	31	1.01	12.3	2.52033	0.527	159.986	39.4874	8.00226	96	80	69	144.96	19	10.5	2.24	78.6	153	78.5	0.351293
Year 1	IR09A130	4	31.1	1.4	9.66	3.21946	0.495	190.368	43.9862	6.92361	96	61	72	133.99	21.5	12	3.705	89.2562	185.5	111.32	0.453793
Year 1	IR09A130	5	34.8	0.802	13.4	2.59701	0.466	99.297	29.4902	2.7651	95	58	66	123.23	23.5	12.5	2.47	88.6	194	88.9	0.419083
Year 1	IR09F436	1	28.9	2.1	12.3	2.34959	0.55	183.632	31.6506	5.22387	87	20	69	87.49	24	12.5	2.755	77.3585	150.5	48.89	0.358484
Year 1	IR09F436	2	31.9	1.36	13.3	2.3985	0.56	193.952	23.3344	3.60026	90	19	63	70.48	16	12	1.58	71.4286	118	22.77	0.244182
Year 1	IR09F436	3	34.2	1.28	13.6	2.51471	0.605	133.945	51.5006	8.47172	88	19	61	85.57	23	14.5	2.615	82.5243	148	34.68	0.288399
Year 1	IR09F436	4	22.7	0.525	8.98	2.52784	0.463	192.436	30.9115	6.88972	88	19	61	87.01	19.5	11.5	1.29	96.3964	138	44.1	0.336359
Year 1	IR09F436	5	29.5	0.606	10.3	2.86408	0.459	185.388	22.3589	2.72005	82	28	63	100.3	22	11	0.88	79.6	135.5	42.5	0.297619
Year 1	IR09L179	1	19.9	1.4	12.3	1.61789	0.576	152.564	27.0568	5.08576	92	12	48	54.25	16.5	9.5	1.465	91.0891	71.5	18.33	0.252549
Year 1	IR09L179	2	29.2	1.32	15.2	1.92105	0.613	134.768	36.5665	5.75722	82	22	58	95.86	21.5	11	1.67	56.4516	136.5	38.13	0.284573
Year 1	IR09L179	3	17.7	0.511	9.01	1.96448	0.66	0	19.5783	3.29583	90	10	43	60.85	19.5	13	1.41	96.6102	89	14.04	0.187475
Year 1	IR09L179	4	20.5	0.584	7.57	2.70806	0.438	164.862	21.8877	3.40796	98	6	44	49.06	11	6	0.955	97.3684	45	4.25	0.0797224
Year 1	IR09L179	5	21.7	0.328	7.98	2.7193	0.38	147.604	42.6241	6.26881	92	14	70	68.84	24	12	1.56	77.5	162	43.6	0.387762
Year 1	IR09L324	1	25.1	0.512	8.09	3.1026	0.531	133.796	38.2678	6.41124	87	81	35	163.92	12.5	8.5	1.145	64.2276	63.5	109.47	0.400417
Year 1	IR09L324	2	31.3	1.15	11.6	2.69828	0.499	207.343	28.5441	2.60333	89	89	63	151.8	19	14	1.6	61.8644	142.5	101.31	0.400261
Year 1	IR09L324	3	31.6	1.35	13.2	2.39394	0.48	116.616	34.7568	6.08695	89	87	64	165.3	18.5	11.5	2.3	82.7586	129.5	134.67	0.448945
Year 1	IR09L324	4	36.7	1.03	9.48	3.87131	0.477	177.687	47.5581	7.82683	87	74	66	147.61	18	10	1.755	77.6119	123	95.85	0.393699
Year 1	IR09L324	5	25.5	0.512	9.66	2.63975	0.527	141.473	47.5048	7.15738	90	48	72	118.14	21	12.5	3.495	82.6	216	94.6	0.444674
Year 1	IR09L337	1	38.4	1.61	11.8	3.25424	0.617	181.325	37.5849	6.65084	88	76	65	148.12	20.75	12	3.05	75.8929	88	108.93	0.42377
Year 1	IR09L337	2	42.3	2.16	14.2	2.97887	0.615	144.728	35.8825	4.74666	88	72	70	120.65	19	11.5	2.28	61.7391	138.5	115.07	0.488164
Year 1	IR09L337	3	45.2	2.05	13.2	3.42424	0.57	166.75	55.1233	9.12278	90	53	71	120.72	19	11.5	2.155	70.8955	117.5	70.95	0.370167
Year 1	IR09L337	4	20.4	0.318	9.96	2.04819	0.503	161.588	46.4266	7.64338	96	53	64	105.19	18.5	9.5	1.395	81.6667	129	78.22	0.426476
Year 1	IR09L337	5	33.9	0.814	9.87	3.43465	0.217	65.685	30.1097	2.4417	88	104	69	194.72	19.5	11	1.955	82.5	109.5	80.5	0.292493
Year 1	IR09N537	1	30.3	1.31	11.3	2.68142	0.528	190.032	31.5433	4.50618	117	83	73	211.1	27	13.5	2.59	80	127.5	126.45	0.374611
Year 1	IR09N537	2	27.3	1.39	12.2	2.2377	0.6	157.568	32.5098	6.0678	116	63	76	174.7	26	11.5	2.385	90.3509	126	100.71	0.365673
Year 1	IR09N537	3	36.1	1.19	11.5	3.13913	0.511	214.678	32.616	4.22351	117	72	68	201.5	25.5	12	2.325	66.6667	105	103.54	0.339431
Year 1	IR09N537	4	21.8	1.02	6.33	3.44392	0.503	133.15	26.1356	3.6983	122	81	60	189.32	24.5	10.5	1.84	90.3704	98.5	94.68	0.33338
Year 1	IR09N537	5	29.6	1.21	11.6	2.55172	0.555	155.589	34.4551	5.29437	123	35	70	103.32	22.5	11	1.725	88.9	99.5	89.6	0.464441
Year 1	IR10A134	1	29.1	0.976	8.78	3.31435	0.575	208.941	27.917	4.41192	93	17	72	78.12	20.5	11	2.01	91.8919	100.5	43.43	0.357302
Year 1	IR10A134	2	30.6	1.49	11.1	2.75676	0.527	189.361	30.5666	6.02266	93	13	70	84.01	23.5	11	1.995	96.0784	130	33.52	0.285204
Year 1	IR10A134	3	23.5	1.94	14.7	1.59864	0.517	168.747	27.9192	5.60043	93	23	79	106.5	23.5	11.5	2.795	95.0355	213	64.1	0.375733
Year 1	IR10A134	4	29.8	0.848	9.53	3.12697	0.488	191.997	38.1706	6.35412	93	17	64	81.72	24	12	1.185	96.2963	152.5	21.62	0.209212
Year 1	IR10A134	5	24.8	0.853	13.6	1.82353	0.55	178.8	33.6739	5.4598	93	13	63	80.18	23.25	12	2.575	89.9	152	45.6	0.362538
Year 1	IR10N230	1	34.9	2.73	12.7	2.74803	0.535	172.187	25.6337	3.74707	120	42	63	134.75	25	14	3.29	85	173	95.94	0.415883
Year 1	IR10N230	2	36.4	2.55	14	2.6	0.542	196.651	25.9728	3.36586	118	42	72	131.79	21.25	9.5	1.255	96.6387	60	54.26	0.291642
Year 1	IR10N230	3	36.5	2.24	14.3	2.55245	0.559	216.89	32.6929	5.53066	114	28	71	119.6	28.5	13	3.75	77.037	169	64.43	0.350106
Year 1	IR10N230	4	34.4	1.81	8.85	3.88701	0.523	226.772	39.7971	7.36175	123	45	67	143.07	25	13	1.965	87.037	115	63.21	0.306428
Year 1	IR10N230	5	32.7	0.722	11.3	2.89381	0.328	95.407	40.0321	6.39271	120	64	72	232.77	30	14.5	3.885	85.6	206.5	44.6	0.160796
Year 1	IR49830	1	33.7	1.53	13.4	2.51493	0.655	151.855	18.6006	6.36945	81	13	61	59.09	18.5	10	0.97	89.5652	76	68.67	0.537492
Year 1	IR49830	2	33.1	1.07	11.4	2.90351	0.595	176.336	42.6603	8.68546	81	25	64	109.83	19.5	10	2.135	82.1782	124	83.44	0.431728
Year 1	IR49830	3	33.7	1.53	13.4	2.51493	0.655	151.855	41.2677	5.82594	81	27	67	116.73	23.5	14	3.43	87.8261	225	88.44	0.431057
Year 1	IR49830	4	16.8	0.83	9.93	1.69184	0.509	156.028	21.9374	3.96518	81	13	56	49.86	18.5	10.5	0.93	100	90.5	18.74	0.273178
Year 1	IR49830	5	22.5	1.03	13.6	1.65441	0.54	125.65	17.2598	2.0417	87	11	56	58.47	16.5	9	1.285	83.4	63	77.5	0.569979
Year 1	IR6-PAK	1	31.8	0.855	10.8	2.94444	0.498	203.88	56.4198	9.94827	104	39	69	137.89	24	12	3.59	82.1429	204.5	85.33	0.382269
Year 1	IR6-PAK	2	29.3	1.47	14	2.09286	0.546	133.731	32.5718	5.73241	104	30	90	130.55	25	13	3.71	79.7	137	67.4	0.34049
Year 1	IR6-PAK	3	27.9	1.61	13.1	2.12977	0.555	131.675	29.5776	5.75566	104	25	78	89.29	22	12	2.12	92.7536	137	35.48	0.284363
Year 1	IR6-PAK	4	33.8	0.975	8	4.225	0.541	170.298	39.5258	5.678	110	42	72	164.72	26.25	11.5	4.06	78.5714	205	80.13	0.327262
Year 1	IR6-PAK	5	27.8	0.663	11.7	2.37607	0.58	160.946	22.9003	2.909	109	31	80	124.62	26	14	3.675	77.3	206.5	56.6	0.312328
Year 1	IR64-NIL	1	33.2	2.2	11.7	2.83761	0.588	157.712	41.3537	6.20241	115	100	80	271.52	24	10.5	2.76	66.6667	136.5	135.27	0.33253
Year 1	IR64-NIL	2	41.1	1.99	14.2	2.89437	0.539	162.226	34.9026	5.215	114	55	86	170.56	23	11	1.81	88.0734	106	101.49	0.373056
Year 1	IR64-NIL	3	31.6	1.28	12.9	2.44961	0.505	131.987	24.3292	4.89252	115	77	74	262.08	24	10.5	2.825	74.7826	133.5	102.1	0.280356
Year 1	IR64-NIL	4	20.9	0.305	6.34	3.29653	0.523	155.428	48.8082	8.04132	111	84	80	265.64	25	11	3.36	86.7257	153	135.36	0.337556
Year 1	IR64-NIL	5	24	0.417	9.11	2.63447	0.493	146.818	34.429	5.37483	111	38	76	165.39	24.5	11.5	2.62	90.9091	142.5	63.54	0.277552
Year 1	IR65482	1	35.3	1.71	10.2	3.46078	0.363	128.198	51.1604	8.32427	144	50	68	225.09	21.5	9	1.3	44.6	98.6	38.59	0.146352
Year 1	IR65482	2	33.8	2.26	15.2	2.22368	0.56	158.642	40.2345	6.49063	143	34	81	140.26	27	10	2.5	28.8462	141.5	38.39	0.214889
Year 1	IR65482	3	38.9	1.28	12.9	3.0155	0.603	165.347	53.5917	8.70224	144	55	70	278.42	22.5	12	1.5	45.7	96.4	24.95	0.0822428
Year 1	IR65482	4	41.7	1.72	11.9	3.5042	0.514	157.234	58.2824	9.13812	137	61	86	242.93	26	11	1.67	57.2727	115.5	62.56	0.204786
Year 1	IR65482	5	26.9	0.574	11.1	2.42342	0.465	150.05	35.5391	5.0203	116	33	75	120.12	21.5	13	2.29	45.8	98	44.6	0.270763
Year 1	IR65600	1	39	2.86	12.6	3.09524	0.617	131.655	28.6721	4.39255	153	48	66	203.39	20.5	8	0.4	8.6	69	20.35	0.0909538
Year 1	IR65600	2	29.7	1.87	14	2.12143	0.61	218.603	34.0649	4.76476	152	41	70	161.86	20.6	10	0.6	9.5	70.8	19.14	0.105746
Year 1	IR65600	3	35	1.49	13.4	2.61194	0.45	157.463	23.0281	2.48601	140	25	70	147.96	18.5	9	0.5	5.88235	59.7	17.27	0.104521
Year 1	IR65600	4	38.2	1.75	9.54	4.00419	0.484	164.199	42.1979	6.45326	144	31	60	117.32	22.5	10.5	0.76	13.5135	58.5	19.56	0.142899
Year 1	IR65600	5	33.3	0.873	12	2.775	0.576	101.335	43.8426	5.92752	146	54	64	227.58	19.5	10	0.4	7.33945	62.6	23.89	0.0950014
Year 1	IR70213	1	31.9	2.34	14	2.27857	0.485	87.786	30.934	6.21165	139	58	80	276.19	24.5	13	2.25	22.2222	152.5	41.46	0.130521
Year 1	IR70213	2	37.2	1.87	13.5	2.75556	0.352	136.04	48.538	8.04064	153	107	70	398.18	22	8	0.805	39.7	38.5	23.59	0.055931
Year 1	IR70213	3	26.7	0.631	10.2	2.61765	0.51	213.611	38.9245	5.88479	153	71	66	245.43	23.6	11.5	1.6	47.5	40.4	21.46	0.0804077
Year 1	IR70213	4	28.8	0.786	11.6	2.48276	0.454	132.194	43.889	7.29939	144	51	77	223.54	26.5	12.5	1.74	59.0164	102	38.23	0.146044
Year 1	IR70213	5	27.7	0.619	11.1	2.4955	0.444	145.111	44.8124	7.13365	144	62	77	240.89	21.5	12	1.8	21.1864	97	33.9	0.123367
Year 1	IR74371	1	32.7	1.71	14	2.33571	0.579	108.848	45.3042	7.0671	142	44	58	165.94	22.5	11.5	0.735	6.36364	78.5	15.85	0.0871885
Year 1	IR74371	2	39.8	1.33	13.2	3.01515	0.46	164.14	49.9622	8.67488	140	87	68	213.02	27	10	1.335	19.2982	122	36.12	0.144979
Year 1	IR74371	3	36.6	1.72	12.8	2.85938	0.483	199.524	54.5434	8.6738	140	74	66	292.5	23.5	12	1.24	6.92308	102.5	20.6	0.0657937
Year 1	IR74371	4	36.1	1.14	10.7	3.37383	0.589	126.562	49.5553	7.50043	144	49	62	121.93	19.4	9	0.7	20	99.1	19.72	0.139216
Year 1	IR74371	5	30.6	0.492	10.3	2.97087	0.513	120.586	45.8536	6.62317	127	59	61	225.04	24	11	1.07	4.54545	100	18.28	0.0751274
Year 1	IR75483	1	31.3	1.18	12.3	2.54472	0.551	257.723	49.5948	8.34159	136	79	70	319.08	27.5	13.5	1.125	40	142.5	51.3	0.138506
Year 1	IR75483	2	33.1	2.33	13.9	2.38129	0.6	172.618	28.5926	1.72673	140	34	86	199.2	27	14	3.05	69.1589	143.5	46.92	0.190639
Year 1	IR75483	3	35.6	2.26	13.8	2.57971	0.549	221.1	46.7849	9.35334	141	58	81	281.31	25	12	2.145	42.8571	121.5	40.23	0.125117
Year 1	IR75483	4	31.1	0.759	12.3	2.52846	0.344	102.247	59.1641	10.3272	154	56	67	241.55	23	10	1.7	2.54237	119.7	15.51	0.0603361
Year 1	IR75483	5	28.8	0.805	11	2.61818	0.349	143.444	18.9803	2.16326	151	62	66	232.71	21	9	1.8	0	120.7	22.16	0.0869463
Year 1	IR78049	1	26.9	1.23	12	2.24167	0.497	213.837	36.8367	6.44005	126	38	62	89.29	22	15	2.58	75.8333	123.5	27.63	0.236315
Year 1	IR78049	2	27.7	2.06	14.7	1.88435	0.583	193.937	41.9096	6.92338	126	29	72	148.37	24	16	3.48	72.5	163.5	34.6	0.189102
Year 1	IR78049	3	26.7	1.93	14.3	1.86713	0.523	179.972	36.6637	5.47327	126	19	67	97.49	22.5	13	1.785	78.125	102	23.22	0.192362
Year 1	IR78049	4	28.1	0.645	10	2.81	0.49	141.878	45.3981	8.21434	125	44	74	159.11	22.5	13	3.12	96.4286	128.5	88.92	0.358505
Year 1	IR78049	5	26.4	0.772	11.5	2.29565	0.441	133.317	38.5797	5.52935	132	41	76	158.85	25	17.5	3.185	87.218	164	59.71	0.273197
Year 1	IR78221	1	27.3	1.11	11.8	2.31356	0.484	150.396	48.295	8.09461	123	30	66	164.04	26.5	13	2.855	77.5	161.5	88.5	0.35044
Year 1	IR78221	2	41.6	2.54	14.1	2.95035	0.482	202.397	53.0909	8.63688	116	67	83	235.31	25	11.5	2.19	91.7293	114	137.85	0.369413
Year 1	IR78221	3	35.9	1.92	13.8	2.60145	0.492	131.433	36.7598	5.94624	124	24	67	111.9	23.5	12	1.88	72.4771	103.5	38.75	0.257219
Year 1	IR78221	4	36.5	1.18	14.7	2.48299	0.48	170.393	41.4781	6.14365	124	45	72	171.47	26	13.5	2.515	89.3204	132.5	57.8	0.252105
Year 1	IR78221	5	36.2	1.61	14.4	2.51389	0.406	158.636	45.6443	6.23	117	68	70	217.77	26	14	3.465	86.4865	155	98.16	0.310702
Year 1	IR78222	1	28.4	0.68	10.5	2.70476	0.506	192.739	54.592	8.9516	120	49	73	244.27	26	13.5	1.955	60.9375	156.5	38.63	0.13655
Year 1	IR78222	2	33.3	1.75	13	2.56154	0.655	120.758	44.5694	6.91214	122	47	81	174.04	26	12	2.99	87.963	148	80.2	0.31545
Year 1	IR78222	3	40.9	1.55	14.6	2.80137	0.634	129.408	44.375	7.00779	117	51	88	203.52	26.5	13	3.49	80.5085	156	73.58	0.265536
Year 1	IR78222	4	36.2	1.01	9.66	3.74741	0.45	176.78	52.7192	8.05172	116	59	87	221.74	24	14	2.375	94.2857	198	102.08	0.315237
Year 1	IR78222	5	33.7	0.693	10.9	3.09174	0.249	78.812	28.0548	3.81866	121	58	75	226.46	25.5	12.5	1.905	62.5	114	41.93	0.156228
Year 1	IR85411	1	31	2.2	13.7	2.26277	0.564	170.285	35.1299	5.82756	69.7	80	62	300.11	20	10	1.33	77.9	144	86.4	0.223539
Year 1	IR85411	2	27.3	0.873	9.71	2.81153	0.542	168.485	34.7728	5.29344	88.6	140	67	351.74	21.5	11	1.78	83.6	154	80.4	0.186051
Year 1	IR85411	3	29.8	1.15	12.3	2.42276	0.528	154.655	28.7874	4.39865	78.5	47	47	162.31	22.5	10	2.3	72.5	179	79.5	0.328771
Year 1	IR85411	4	20.5	0.272	5.88	3.48639	0.467	178.27	19.5105	3.01264	80.4	55	49	183.94	23.5	11	2.1	82.5	145	73.5	0.285503
Year 1	IR85411	5	28.5	0.523	10.1	2.82178	0.604	115.485	31.4834	5.08557	71.5	102	53	279.3	23.3	9	1.1	78.9	162	70.9	0.202456
Year 1	IR85422	1	41.1	2.91	13.2	3.11364	0.536	132.759	36.2376	4.73945	92	50	77	128.4	25	12	2.445	90.9091	126	93.77	0.422064
Year 1	IR85422	2	34.5	0.837	14.6	2.36301	0.538	140.691	38.4418	6.67357	95	35	75	106.55	27.5	10.5	3.38	97.0149	170	57.54	0.350661
Year 1	IR85422	3	23.9	1.22	12.3	1.94309	0.523	194.27	38.3864	6.29796	97	24	65.5	31.23	22	10	1.795	91.3793	106.5	29.92	0.489289
Year 1	IR85422	4	21.8	0.637	7.22	3.01939	0.537	169.35	55.3347	8.29002	96	30	72	108.34	24	9.5	1.435	74.6269	123	38.64	0.262893
Year 1	IR85422	5	17.1	0.508	9.34	1.83084	0.475	162.861	10.1948	0.570919	96	24	51	67.09	20	11.5	1.435	0	84.5	56.7	0.458034
Year 1	IR85427	1	18.4	0.65	8.32	2.21154	0.522	131.404	25.4284	4.32809	134	39	117	251.28	29	12.5	1.91	67.7	138.5	55.6	0.181178
Year 1	IR85427	2	24.8	0.882	10.7	2.31776	0.615	147.356	18.3304	3.77137	134	52	113	291.11	28	14.5	2.855	50.4202	210.5	48.24	0.142154
Year 1	IR85427	3	29.6	1.11	12.5	2.368	0.574	142.886	50.862	7.91081	139	39	118	268.2	29.5	11	4.275	70.297	262.5	95.17	0.261909
Year 1	IR85427	4	16.8	0.252	5.32	3.15789	0.5	196.036	31.8508	6.92745	141	88	94	475.67	23.5	11.5	0.555	55.6	114.5	32.11	0.063236
Year 1	IR85427	5	24.3	0.598	9.66	2.51553	0.465	89.792	26.8138	4.24769	139	61	81	251.52	23	9.5	0.735	59.6	86.5	24.62	0.0891577
Year 1	IR86052	1	22	0.569	9.21	2.38871	0.566	162.465	23.0225	4.45591	95	22	90	109.65	26.5	15	2.3	71.4286	161	37.92	0.256963
Year 1	IR86052	2	35.8	1.87	12.9	2.77519	0.503	137.826	44.5186	8.30559	95	50	97	206.34	26	13	2.365	58.1967	99.5	78.8	0.276355
Year 1	IR86052	3	22.8	0.827	10.8	2.11111	0.552	179.933	45.6342	7.78708	115	49	66	168.94	20	11.5	1.465	93.2886	58.5	64.87	0.277448
Year 1	IR86052	4	27.8	0.726	9.56	2.90795	0.558	164.188	37.5432	6.54954	99	46	98	142.43	27	14.5	0.935	89.4366	108.5	71.66	0.334719
Year 1	IR86052	5	26.9	0.505	9.69	2.77606	0.411	147.777	38.9855	5.24374	155	78	50	295.88	22.5	12	0.66	67.6	88.6	46.6	0.136066
Year 1	IR86126	1	26.2	0.77	9.21	2.84473	0.548	186.077	32.8782	6.77233	112	47	100	229.45	28	12	1.765	94.0171	81.5	45.57	0.165697
Year 1	IR86126	2	38.3	1.23	13.3	2.8797	0.554	167.865	39.3518	5.24513	116	86	85	264.24	20	10.5	0.99	99	67	55.55	0.173708
Year 1	IR86126	3	34	0.944	11.7	2.90598	0.574	135.128	34.4471	5.21887	112	57	107	288.18	29	12	2.945	86.1111	154	114.59	0.284505
Year 1	IR86126	4	21.9	0.464	7.33	2.98772	0.499	190.486	39.2647	6.30772	115	47	82	189.19	26	10	2.595	97.2477	111	69.67	0.269142
Year 1	IR86126	5	26.9	0.766	13	2.06923	0.478	118.547	26.8181	1.98984	117	55	110	246.17	24	11.5	2.535	83.6	64	73.6	0.230165
Year 1	IR86174-1	1	33.8	0.944	11.3	2.99115	0.581	211.687	62.3109	8.42788	98	56	70	171.52	23	15.5	2.875	88.6	144.5	88.6	0.340612
Year 1	IR86174-1	2	38.6	2.15	14	2.75714	0.498	192.977	40.698	6.03753	94	45	80	156.98	24	99.5	3.54	90.8333	86.5	85.6	0.352873
Year 1	IR86174-1	3	41.1	1.71	14.9	2.75839	0.463	189.721	29.9777	5.03511	100	41	72	114.58	20.5	14	3.105	93.0693	213	88.77	0.436538
Year 1	IR86174-1	4	21.3	0.709	6.19	3.44103	0.468	152.201	42.7485	6.57735	101	58	66	136.03	19	9.5	2.035	87.5	109.5	101.6	0.427555
Year 1	IR86174-1	5	25.9	0.456	9.1	2.84615	0.544	143.215	33.9956	2.96941	96	66	73	180.72	20	13.5	3.485	82.5	185	94.6	0.3436
Year 1	IR86174-2	1	21.4	0.747	9.72	2.20165	0.518	179.279	19.3556	4.23805	108	35	85	68.39	24.5	10	2.365	80.5	96	77.6	0.531543
Year 1	IR86174-2	2	32.5	1.39	12.2	2.66393	0.61	170.921	24.2897	3.13308	106	31	102	123.38	29	15.5	3.735	96.6667	204	89.92	0.421566
Year 1	IR86174-2	3	22.3	0.613	9.06	2.46137	0.472	127.335	36.3134	5.45234	108	66	73	207.74	23.5	12	1.6	80	100	60.66	0.226006
Year 1	IR86174-2	4	23.3	0.394	7.22	3.22715	0.458	188.157	34.1726	6.18631	111	55	80	206.26	26	14	3.89	97.3214	165	96.51	0.318757
Year 1	IR86174-2	5	19.1	0.413	7.73	2.47089	0.527	144.226	39.5665	6.10332	107	43	99	182.12	28	13.5	3.89	84.6	180.5	69.7	0.276785
Year 1	IR86174-3	1	25.6	1.8	10.2	2.5098	0.618	148.492	23.9698	4.33302	95	32	73	93.09	27	13.5	2.965	77.8	138	43.5	0.318471
Year 1	IR86174-3	2	29.8	1.29	14.1	2.11348	0.565	173.18	35.2123	5.6633	94	27	77	106.88	21.5	13	1.445	81.0345	110.5	31.1	0.225395
Year 1	IR86174-3	3	30	0.945	11.4	2.63158	0.448	131.345	32.1119	4.84161	96	35	65	125.24	22.5	12.5	1.12	90.678	109	27.04	0.177568
Year 1	IR86174-3	4	25.5	0.621	9.17	2.78081	0.387	197.422	32.0746	4.62488	101	35	80	107.79	23	11	1.88	89.9083	93	61.45	0.363094
Year 1	IR86174-3	5	20.6	0.369	8.04	2.56219	0.552	179.621	31.2459	4.67385	104	23	68	87.89	21	10	1.215	73.6	89.5	55.3	0.3862
Year 1	IR86635	1	27.6	2.61	12.4	2.22581	0.567	189.596	36.4704	5.66469	164	62	73	366.48	17.5	6	0.285	76.4	88.7	17.82	0.04637
Year 1	IR86635	2	24.2	1.29	11.2	2.16071	0.491	149.018	24.1925	4.6895	158	14	73	44.08	22	8.5	0.505	66.9	87.5	18.9	0.300095
Year 1	IR86635	3	25.4	0.506	9.33	2.7224	0.463	123.4	39.6796	5.72112	160	55	60	222.63	21.2	9	0.56	87.3	79.3	19.99	0.0823922
Year 1	IR86635	4	24.3	0.845	7.44	3.26613	0.501	177.321	34.4642	5.36069	158	47	74	235.54	22	11	2.085	88.5	121	25.41	0.097375
Year 1	IR86635	5	20.2	0.385	8.31	2.43081	0.487	111.614	30.501	4.47488	147	35	67	256.42	18.4	11	1.44	72.5	87.4	20.3	0.0733594
Year 1	IR88633	1	26.1	0.928	15	1.74	0.45	133.32	41.288	6.68795	119	73	54	260.39	19.5	11	1.1	78.5	88.6	54	0.171761
Year 1	IR88633	2	30	1.57	11.9	2.52101	0.598	166.907	43.1848	7.78809	120	97	96	237.25	21	12.2	0.9	77.5	67.5	27.5	0.103872
Year 1	IR88633	3	27	0.637	10.5	2.57143	0.464	147.707	35.5583	5.51107	124	74	58	260.91	20	12.3	1.2	91.4	49.3	55.3	0.174884
Year 1	IR88633	4	27.4	0.493	8.57	3.1972	0.409	114.316	30.5372	4.91068	122	83	75	215.83	22.5	12	1.775	92.9688	94.5	102.3	0.321567
Year 1	IR88633	5	29.2	0.536	10.4	2.80769	0.386	138.057	43.5623	6.48626	123	71	58	301.3	22	12.2	0.8	89.5	77.5	66.7	0.18125
Year 1	IR93323	1	31.5	1.81	13.7	2.29927	0.537	162.553	28.6133	5.74985	138	22	90	69.04	20.5	10.5	2.24	98.0769	110	42.11	0.378857
Year 1	IR93323	2	33.9	1.93	13.1	2.58779	0.573	136.377	36.7881	5.06032	126	40	105	189.57	28	17.5	3.675	90.4762	176	90.13	0.322238
Year 1	IR93323	3	34.6	1.36	11.8	2.9322	0.537	177.335	39.0703	6.27219	135	41	103	224.38	25	12	3.255	93.6364	165.5	109.4	0.327761
Year 1	IR93323	4	31.6	0.927	9.47	3.33685	0.475	203.987	26.165	3.14427	137	45	101	220.21	24	12.5	1.44	93.578	119.5	70.81	0.243317
Year 1	IR93323	5	29	0.92	12.4	2.33871	0.565	143.25	23.4102	3.14563	137	47	51	97.27	22.5	11	1.65	81.4815	79	22.82	0.190024
Year 1	IR93324	1	25.5	2.38	11.7	2.17949	0.548	197.077	29.3503	4.9157	137	54	52	229.69	15.6	9	0.9	77.5	145	27.4	0.106577
Year 1	IR93324	2	29.1	1.45	12.7	2.29134	0.582	127.379	38.9278	6.72304	166	83	132	477.76	18.4	12	0.89	80.3	165	37.5	0.0727788
Year 1	IR93324	3	23.3	0.688	9.94	2.34406	1.04	148.181	51.0542	6.06663	145	70	68	472.16	26.2	9	0.99	79.5	188	17.6	0.035936
Year 1	IR93324	4	24.2	0.382	7.99	3.02879	0.56	134.56	32.5007	4.55849	158	60	79	308.18	20	10	1	81.0345	159	24.4	0.0733658
Year 1	IR93324	5	22.2	0.378	8.5	2.61176	0.425	177.884	52.4657	7.89567	156	62	70	353.4	14.6	11	1.1	90.678	167	26.6	0.07
Year 1	IRRI 123	1	25.7	1.18	8.72	2.94725	0.586	168.226	28.679	4.5297	155	63	58	197.92	20	10	1.2	90	167	35	0.150266
Year 1	IRRI 123	2	27.5	2.23	14.2	1.93662	0.613	139.406	30.6141	4.48622	154	44	74	178.25	23	9	1.1	49	178	88.4	0.331521
Year 1	IRRI 123	3	28.8	1.34	13.2	2.18182	0.55	151.617	34.2934	6.06779	145	61	59	201.88	22.1	10	0.8	87	167	87	0.301163
Year 1	IRRI 123	4	32.9	1.44	11.2	2.9375	0.501	208.943	37.0888	5.21929	139	74	72	333.03	19	11	0.69	88.5	129	69	0.171629
Year 1	IRRI 123	5	34.8	1.29	13.2	2.63636	0.471	130.852	46.1191	7.55714	154	77	61	169.61	18	10	1.1	88.4	155	59.3	0.259054
Year 1	IRRI 152	1	23.2	0.452	8.48	2.73585	0.537	213.722	35.1017	6.28497	116	72	96	342.85	23.25	19	0.62	77.3	157	16.57	0.0461021
Year 1	IRRI 152	2	31.7	1.48	12.6	2.51587	0.567	155.318	34.9034	5.65636	139	55	118	332.18	27	13	0.38	7.3	122	11.49	0.0334332
Year 1	IRRI 152	3	28.4	1.05	10.7	2.65421	0.546	221.446	37.8021	5.38722	114	62	108	362.61	21.5	19	1.13	89.3805	134	25.67	0.0661121
Year 1	IRRI 152	4	33.1	1.14	7.35	4.5034	0.54	168.985	41.5662	5.97704	137	76	88	370.3	18	12	0.615	82.3	69	12.05	0.0315156
Year 1	IRRI 152	5	16.2	0.37	6.89	2.35123	0.471	149.076	41.4237	5.82445	134	83	121	420.94	26	14.5	0.15	72.1	40.5	21	0.0475178
Year 1	IRRI 154	1	29	0.74	10.9	2.66055	0.529	216.285	54.2202	7.84172	137	65	58	177.8	21.5	12	1.725	59	103.5	55	0.236254
Year 1	IRRI 154	2	39.2	2.01	14	2.8	0.564	189.397	41.0835	6.24109	138	82	72	287.25	26	12.5	2.4	75.2	105	112.71	0.281803
Year 1	IRRI 154	3	24.9	0.807	10.9	2.2844	0.582	132.41	46.7849	7.4512	141	57	69	139.2	21	12.5	1.195	76	94	48.41	0.258035
Year 1	IRRI 154	4	29.1	1.29	10.1	2.88119	0.485	213.042	38.3954	4.84257	125	51	77	166.75	23.5	12.5	1.945	89.9083	99.5	64.76	0.279729
Year 1	IRRI 154	5	20.1	0.901	9.25	2.17297	0.418	139.016	46.1858	6.30157	103	101	65	211.12	23	9.5	2.25	72	103.5	78	0.269784
Year 1	IRRI 157	1	30.5	1.23	12	2.54167	0.56	201.727	43.0886	6.97405	123	76	69	352.09	18	11	0.9	55.2	123	66.5	0.158867
Year 1	IRRI 157	2	39.1	1.26	12.8	3.05469	0.516	154.666	31.012	4.66296	134	114	78	546.34	27	12	0.91	55.7	120	45.3	0.0765668
Year 1	IRRI 157	3	26.7	0.987	10.8	2.47222	0.571	158.957	55.2578	9.60652	111	37	107	212.75	30.5	15.5	0.855	44.8598	110	39.47	0.15649
Year 1	IRRI 157	4	11.9	0.149	3.92	3.03571	0.549	161.795	42.3597	6.0078	116	92	88	479.54	15	10	1.2	65	159	55.4	0.103563
Year 1	IRRI 157	5	18.8	0.361	6.91	2.72069	0.38	96.619	56.4604	8.32715	102	64	76	292.42	31	14.2	1.19	39	154	45.4	0.134391
Year 1	MIL 240	1	21.3	0.675	9.57	2.22571	0.536	138.094	34.4268	5.57685	107	34	56	118.27	28.5	14	1.2	96	135.5	31.31	0.209319
Year 1	MIL 240	2	29.4	1.24	12.3	2.39024	0.488	188.744	29.6861	4.64074	105	33	88	149.49	26.25	10	2.345	91.6667	120	61.98	0.293091
Year 1	MIL 240	3	36	1.01	12.4	2.90323	0.426	115.71	36.7214	5.43697	107	71	89	215.88	26.5	11	2.15	97.2477	125	79.49	0.26912
Year 1	MIL 240	4	19.1	0.354	6.73	2.83804	0.469	128.536	36.1077	5.42133	107	54	77	156.47	21.5	9	1.7	90.099	106.5	56.24	0.264398
Year 1	MIL 240	5	29.1	0.493	9.7	3	0.647	119.037	43.1949	7.01878	107	36	78	131.96	28.5	10	1.73	0	125.5	59.3	0.310049
Year 1	MTU1010	1	25	0.979	11.6	2.15517	0.461	164.064	27.2385	2.80033	117	55	69	128.41	25.5	12.5	2.27	87.2611	132	80.2	0.384449
Year 1	MTU1010	2	35	1.02	11.9	2.94118	0.533	115.038	34.7173	5.27202	136	88	82	401.93	22	11	0.36	67.33	84.5	38.02	0.0864189
Year 1	MTU1010	3	24.9	0.644	10.6	2.34906	0.393	140.609	44.6724	6.28915	124	42	60	109.74	23.5	12.5	2.205	94.0741	106	38.16	0.258012
Year 1	MTU1010	4	29.5	0.724	8.95	3.29609	0.409	177.585	42.4195	6.55657	143	64	80	244.63	24.5	10	1.585	40	111.5	45.13	0.15575
Year 1	MTU1010	5	23.1	0.374	8.15	2.83436	0.525	125.825	36.371	7.17388	119	94	82	482.46	21	10	1.12	56.1	110.2	54.2	0.100995
Year 1	PALMAR 18	1	26	1.61	13.2	1.9697	0.586	149.305	37.0561	6.16817	115	73	81	228.93	27	12	2.495	94.0171	134.5	115.77	0.335857
Year 1	PALMAR 18	2	33.7	2.02	14.6	2.30822	0.556	180.94	35.1209	6.29036	116	47	81	156.64	28	11.5	2.965	96.3964	134.5	89.07	0.362501
Year 1	PALMAR 18	3	30.6	1.69	13.1	2.33588	0.561	169.857	30.3316	5.24698	113	61	84	196.83	24	11	2.55	94.3396	110.5	111.45	0.361522
Year 1	PALMAR 18	4	21.2	0.357	7.45	2.84564	0.542	159.066	36.0421	6.12987	114	85	79	238.36	29	14.5	3.435	86	137.5	149.9	0.386081
Year 1	PALMAR 18	5	23.6	0.725	8.62	2.73782	0.392	156.41	30.3033	4.51936	123	93	69	242.34	23.5	9.5	1.555	0	103	121	0.333021
Year 1	WAB 56-125	1	38.2	2.24	11.5	3.32174	0.472	121.042	41.8814	7.83554	142	67	96	281.32	25.5	13.5	0.465	60.3	75	21.5	0.0709993
Year 1	WAB 56-125	2	38.9	2.06	14.8	2.62838	0.559	218.051	40.1192	6.61571	143	39	90	202.08	29	13.5	1.825	61.0619	105.5	37.98	0.15821
Year 1	WAB 56-125	3	27.6	0.956	11.6	2.37931	0.516	204.485	36.2738	5.35892	144	26	82	136.91	21	10	1.065	73.1707	62.5	23.86	0.148411
Year 1	WAB 56-125	4	29.3	0.702	11.8	2.48305	0.639	167.809	42.4174	6.16827	137	50	78	210.86	27.5	14	1.015	70.073	72.5	35.9	0.145485
Year 1	WAB 56-125	5	31.4	0.689	11.5	2.73043	0.387	128.479	43.5718	3.44343	144	44	80	171.24	22.5	10	1.675	7.46269	91	26.49	0.133971
Year 1	Thad	1	29	1.58	11.3	2.56637	0.583	204.066	26.1955	4.66685	97	18	66	101.13	25	13.5	3.615	90.4348	164.5	47.09	0.317703
Year 1	Thad	2	34.3	2.25	14	2.45	0.548	181.378	26.7144	3.8941	99	11	68	61.33	22.5	15	2.48	91.5888	122	18.69	0.233567
Year 1	Thad	3	33.5	1.59	14	2.39286	0.52	159.544	29.2124	5.36466	100	16	57	83.31	23	13.5	2.45	0	110	66.5	0.443896
Year 1	Thad	4	25.3	0.353	10	2.53	0.38	156.2	50.0572	8.09445	97	29	66	125.01	24	14.5	3.285	90	161	71.17	0.362779
Year 1	Thad	5	30.9	0.819	12.6	2.45238	0.548	167.067	50.862	8.27811	97	22	66	126.79	27	12.5	3.52	0	175.5	69.3	0.353409
Year 1	Rex	1	35.9	1.34	13.3	2.69925	0.44	185.796	33.448	6.29838	100	14	73	89.86	20.5	12.5	2.665	78.4	141	65.4	0.421229
Year 1	Rex	2	28.2	2.3	14.1	2	0.635	148.099	40.2911	6.10931	99	17	88	118.89	21.5	11	3.065	94.5946	130.5	44.27	0.271329
Year 1	Rex	3	36.3	1.92	13.1	2.77099	0.598	110.151	26.7652	0.913348	103	9	64	68.86	20	13	2.365	97	117	20.72	0.231302
Year 1	Rex	4	38.1	1.02	14.1	2.70213	0.54	166.767	58.4351	9.25601	96	22	72	131.46	22	15.5	4.33	88	220	56.57	0.300856
Year 1	Rex	5	28.6	0.535	10.4	2.75	0.425	155.422	35.6475	6.76515	97	17	66	118.94	20	14	4.025	87.2	158	59.3	0.332697
Year 2	12DS-15	1	30.4	1.9	13.6	2.23529	0.618	157.049	39.3336	6.39808	120	58	81	121.24	23	10.5	2.42	80.1639	107	98.64	0.448608
Year 2	12DS-15	2	30.2	1.73	14	2.15714	0.545	106.018	36.7214	5.18772	119	52	84	177.56	23	11.5	2.595	86.614	96.5	82.17	0.316367
Year 2	12DS-15	3	25	1.61	11.9	2.10084	0.551	154.215	32.945	5.84472	124	33	79	149.24	23	10	2.42	88.7826	108.5	69.96	0.319161
Year 2	12DS-15	4	23.9	0.825	7.66	3.1201	0.435	152.314	45.3099	7.4758	116	43	82	145.6	22.5	12.5	3.23	93.2609	137	74.92	0.339742
Year 2	12DS-15	5	28.5	0.764	11.3	2.52212	0.492	175.515	31.7083	4.15123	125	39	75	145.07	24	10.5	2.095	76.4	95.5	88.6	0.379167
Year 2	12DS-25	1	36.7	2.81	11.7	3.13675	0.531	222.936	42.9893	7.36819	121	51	93	145.66	29	11	3.4	0	145.5	123.3	0.458432
Year 2	12DS-25	2	37.5	2.06	13.9	2.69784	0.607	115.649	42.0025	6.87293	120	78	100	312.54	24.5	11	2.995	75.7458	128	189.52	0.377485
Year 2	12DS-25	3	28	1.5	12.9	2.17054	0.563	90.39	49.4762	7.49724	123	43	99	195.47	29	11	3.4	93	145.5	100.21	0.338914
Year 2	12DS-25	4	23.6	0.893	7.54	3.12997	0.465	152.373	32.9348	5.43339	117	58	85	214.91	25.5	12.5	2.71	93.0583	188	123.13	0.364247
Year 2	12DS-25	5	21.8	0.791	6.16	1.91558	0.411	119.417	25.7838	3.70608	125	52	90	234.46	25.5	10.5	2.495	84.8049	118	135	0.365398
Year 2	75-1-127	1	34	1.66	12.5	2.72	0.579	171.948	41.6554	6.32597	126	32	87	103.83	24.5	11.5	2.745	88.4375	144	45.97	0.306876
Year 2	75-1-127	2	30.1	1.58	14.2	2.11972	0.572	125.061	38.1862	5.87997	129	54	89	232.71	23.75	12.5	2.915	81.2	145.5	111.85	0.324617
Year 2	75-1-127	3	32.3	2.02	13.9	2.32374	0.472	174.687	37.3488	5.8581	133	37	79	153.61	24.5	11.5	2.745	91.7099	144	52.55	0.254899
Year 2	75-1-127	4	21.3	0.519	7.28	2.92582	0.471	195.11	45.3992	7.41806	127	56	80	212.98	20.2	11.5	1.95	88.8	97	88.33	0.293153
Year 2	75-1-127	5	24.9	1.13	11.5	2.16522	0.548	150.494	30.4139	4.21253	141	23	75	129.22	24.5	11.5	2.415	73.4	136	55.4	0.300076
Year 2	Apo	1	33.5	1.73	11.1	3.01802	0.585	182.852	38.2993	5.77325	119	71	86	178.77	29	12.5	2.825	75.9159	192	119.05	0.399738
Year 2	Apo	2	30.5	1.55	11.2	2.72321	0.482	123.731	33.9227	4.79131	122	91	87	256.3	25.5	13	3.11	76.0467	175.5	159.38	0.38342
Year 2	Apo	3	28.8	1.75	13.8	2.08696	0.519	98.857	39.1878	6.61412	125	33	82.5	119.93	29	12.5	2.825	87.3396	192	84.7	0.413918
Year 2	Apo	4	22.9	0.582	11	2.08182	0.584	162.568	39.7485	7.29383	117	43	81	131.25	26.5	12.5	2.71	82.2881	150	90.67	0.408571
Year 2	Apo	5	27.7	0.775	11.7	2.36752	0.562	173.608	33.1618	5.30713	127	44	74	157.07	26.5	13	2.61	77.5	167.5	114.5	0.421622
Year 2	BR47	1	36.4	1.12	14.8	2.45946	0.59	124.843	42.8061	7.64298	140	70	91	235.8	22.5	12	0.995	55.4	93.5	19.08	0.0748588
Year 2	BR47	2	40.4	2.53	14.5	2.78621	0.559	159.198	45.302	7.1117	124	57	95	223.28	25	13.5	2.375	62.3	131	44.5	0.166181
Year 2	BR47	3	31.4	0.705	11.6	2.7069	0.515	106.064	47.0449	7.31604	145	60	92	254.38	22.5	12	0.885	67.0339	93.5	66.03	0.20608
Year 2	BR47	4	32.1	0.651	12.1	2.65289	0.486	157.949	48.9631	8.42945	138	91	86	283.77	26	13.5	0.78	77.1	75	18.5	0.0612036
Year 2	BR47	5	34.2	0.706	11.4	3	0.493	169.936	50.9965	7.59434	148	72	100	308.2	26	12.5	1.875	67.9091	121	37.01	0.10721
Year 2	COL XXI	1	35.3	2.05	12	2.94167	0.518	166.008	39.9168	6.00618	142	47	82	172.41	28.5	14.5	3.575	86.9231	175	80.68	0.31878
Year 2	COL XXI	2	30.6	1.69	12.8	2.39062	0.534	218.919	45.6443	7.14896	142	41	102	159.32	27	14	2.755	76.2	153.5	73.4	0.3154
Year 2	COL XXI	3	28.6	1.18	12.5	2.288	0.486	126.757	47.8892	7.9342	142	58	79	190.15	28.5	14.5	3.575	89.4912	175	115.44	0.377761
Year 2	COL XXI	4	34.3	0.972	11.6	2.9569	0.534	111.845	45.4082	7.15643	138	45	90	152.19	26.5	12.5	1.74	70.5556	135	84.3	0.356463
Year 2	COL XXI	5	31.4	1.01	14.2	2.21127	0.582	188.119	40.2831	7.16198	149	67	75	201.13	27.5	13	2.255	88.9	143.5	88.4	0.305322
Year 2	CT18233	1	37.8	3.29	13.8	2.73913	0.548	236.048	32.88	3.04398	135	25	91	90.91	23	14.5	2.37	83.4959	128	37.06	0.289599
Year 2	CT18233	2	41.4	2.13	15.5	2.67097	0.495	188.227	51.8227	8.14546	132	32	99	155.11	23.5	16	3.8	84	169.5	65.54	0.297031
Year 2	CT18233	3	32.2	1.09	12	2.68333	0.414	116.662	43.2119	5.652	135	48	91	188.71	23	14.5	2.37	93.2593	128	80.8	0.299803
Year 2	CT18233	4	32.3	1.35	11.8	2.73729	0.479	174.41	54.7142	7.7	127	50	90	186.03	23.5	14.5	3.77	92.6562	168	58.26	0.238487
Year 2	CT18233	5	27.4	1.13	13.3	2.06015	0.572	130.919	30.1347	4.14553	149	25	80	86.18	24.5	15	3.3	77.4688	159.5	28.8	0.250478
Year 2	CT18237	1	42.1	3.01	14.4	2.92361	0.571	181.871	37.3306	5.81729	125	43	92	174.37	29	14.5	3.7	73.9	161.5	67.4	0.278777
Year 2	CT18237	2	37.2	2.14	15.3	2.43137	0.559	174.445	38.0179	6.48547	127	44	87	186.19	26.25	12.5	2.93	88.2963	144.5	104.92	0.360414
Year 2	CT18237	3	30.2	1.13	13	2.32308	0.584	168.285	46.5419	7.57077	132	57	90	198.59	29	14	3.7	72	161.5	75.8	0.276249
Year 2	CT18237	4	25.7	0.528	8.3	3.09639	0.502	154.75	25.9851	1.69511	117	26	83	116.54	27.5	13	3.03	95	113.5	31.85	0.214637
Year 2	CT18237	5	27.7	0.748	9.11	3.04061	0.507	174.969	43.95	6.80264	135	59	78	235.91	26.5	12	2.43	82.5	134.5	99.2	0.296022
Year 2	CT18244	1	23.6	0.546	10.6	2.19	0.66	122.3	67.6878	10.5	127	70	82	256.76	29.75	15	4.81	88.3	201.5	99.5	0.27929
Year 2	CT18244	2	27.3	1.5	13.8	1.97826	0.607	136.062	37.6404	7.07892	127	46	90	143.97	14	7	2.785	75.8	121.5	98.58	0.406432
Year 2	CT18244	3	36.1	1.51	14	2.57857	0.58	195.669	28.2075	5.11719	127	52	89	237.35	30.5	15	4.81	82.5238	201.5	148.9	0.385502
Year 2	CT18244	4	32.9	1.3	8.64	3.80787	0.578	166.284	46.5905	7.71739	124	44	84	188.02	26.5	12.5	3.13	82	169	93.63	0.332434
Year 2	CT18244	5	33.3	1.41	12.1	2.75207	0.481	99.741	33.9804	5.20102	132	48	83	204.2	14.5	7.5	2.535	80.2	116.5	84.7	0.293181
Year 2	CT18245	1	34	1.65	13.9	2.44604	0.574	196.701	38.114	6.44683	126	40	83	169.36	28	10	2.34	83.0435	114	72.62	0.300107
Year 2	CT18245	2	29.8	1.15	12	2.48333	0.448	160.623	41.0349	6.34371	128	39	90	158.31	27.5	10.5	2.31	85.578	109	52.69	0.249716
Year 2	CT18245	3	36.3	1.54	14.1	2.57447	0.55	155.3	27.6446	4.39025	130	78	99	277.95	28	10	2.34	90	114	138.23	0.33214
Year 2	CT18245	4	31.1	0.608	8.46	3.67612	0.404	154.204	52.9509	8.69754	128	52	83	164.52	25.5	10.5	2.22	76	103	48.41	0.227352
Year 2	CT18245	5	28.1	0.623	10.8	2.60185	0.61	173.2	35.851	4.33519	131	58	86	247.08	28.5	11.5	1.81	88.5	100.5	88.3	0.263283
Year 2	CT18247	1	39.4	2.67	13.9	2.83453	2.19	106.792	40.5159	7.15582	92	48	89	165.51	23.5	11	2.635	83.7008	145.5	84.24	0.337297
Year 2	CT18247	2	33.1	0.889	12.8	2.58594	0.495	155.743	30.6446	4.34279	94	35	89	135.29	25.5	13.5	2.355	76.9624	148.5	55.39	0.290487
Year 2	CT18247	3	41.9	1.98	13.6	3.08088	0.526	93.636	38.5797	5.34569	104	45	95	182.44	23.5	11	2.635	89	145.5	98.55	0.350724
Year 2	CT18247	4	26.5	0.7	8.39	3.15852	0.558	150.682	43.9841	8.05702	99	48	81	176.55	23.5	14.5	2.04	90.8148	152.5	107.95	0.379438
Year 2	CT18247	5	32.1	0.718	11.5	2.7913	0.531	124.053	27.6602	3.19044	105	43	83	167.43	26.5	12.5	2.02	73.6	138.5	77.5	0.316417
Year 2	CT18372	1	28.3	1.17	10.5	2.69524	0.328	114.567	28.0911	4.25447	140	74	85	236.18	23.25	13	1.19	93.5	95.5	33.93	0.125615
Year 2	CT18372	2	27.3	0.578	9.92	2.75202	0.491	179.491	30.1224	4.51342	144	29	80	113.57	21.75	13.5	2.18	72.1802	134.5	22.99	0.168351
Year 2	CT18372	3	36.3	1.49	12.6	2.88095	0.566	115.671	40.6233	7.38814	147	67	75	211.73	23.5	13	1.16	56.0438	95.5	48.45	0.186217
Year 2	CT18372	4	32.3	0.987	9.19	3.51469	0.464	177.086	36.2162	5.21157	136	74	83	155.38	22.25	13	1.07	38.4528	81	50.31	0.244591
Year 2	CT18372	5	22.2	0.453	9.12	2.43421	0.487	184.337	33.683	4.80461	147	46	77	150.27	22	12.5	1.68	75.3	124.5	56.8	0.274303
Year 2	CT18593	1	29.7	0.792	10.5	2.82857	0.55	148.692	44.721	6.43577	128.8	57	55.6	190.08	33.2	10.5	1.33	55.7	113.2	16.29	0.0789359
Year 2	CT18593	2	36	1.47	13.4	2.68657	0.538	187.444	36.8955	5.52876	165	43	45.6	184.76	22	13.2	1.43	43.7	101.3	25.9	0.122947
Year 2	CT18593	3	34.9	1.31	13	2.68462	0.506	123.173	33.0908	4.69729	155.7	66	44.2	207.47	21.4	9.8	2.34	29.7	84.5	27.48	0.116961
Year 2	CT18593	4	23.2	0.563	8.44	2.74882	0.474	165.062	28.0019	4.32532	161	22	55.2	54.14	27.4	11.2	1.99	62.6	123.4	8.33	0.133344
Year 2	CT18593	5	24.3	0.44	9.12	2.66447	0.378	128.771	45.1109	6.09099	168	76	49	282.13	19.9	9.3	3.12	55.7	131.3	17.68	0.0589707
Year 2	CT18614	1	20.7	0.533	9.82	2.10794	0.488	153.575	43.2119	6.46533	126	72	90	152.71	26.805	14	1.45	73.8889	107	89.36	0.369149
Year 2	CT18614	2	29.1	1.37	11.9	2.44538	0.596	162.071	33.4977	5.18959	144	59	88	187.76	28	13.5	2.515	45.5455	127	83.14	0.306903
Year 2	CT18614	3	25.8	0.945	10.6	2.43396	0.495	216.982	49.0817	7.00435	142	75	76	253.53	27.5	14	1.45	63.4762	107	68.36	0.212371
Year 2	CT18614	4	29.1	0.657	9	3.23333	0.511	140.616	48.4285	8.40388	140	80	85	222.95	27.5	12.5	2.29	53.3333	124	47.75	0.176395
Year 2	CT18614	5	15.6	0.383	8.15	1.91411	0.484	129.485	31.5172	4.53417	144	34	85	149.62	29	12.5	2.015	75	117	35.19	0.190412
Year 2	CT18615	1	25.2	0.605	9.19	2.74211	0.483	203.072	37.5058	6.14915	112	56	95	168.17	26	12	3.26	82.4444	171.5	112.46	0.400741
Year 2	CT18615	2	24.9	1.96	14	1.77857	0.534	188.484	31.3884	5.82342	123	58	97	134.21	31.5	13.5	3.445	85.75	156	39.31	0.226544
Year 2	CT18615	3	35.3	1.43	12.9	2.73643	0.487	129.14	27.9747	3.864	119	90	106	297.25	26.5	11.5	3.26	81.2353	171.5	191.03	0.39123
Year 2	CT18615	4	32.3	1.1	9.96	3.24297	0.51	175.054	28.0302	4.14778	137	41	86	121.6	23.5	11.5	1.22	82.4078	74.5	55.2	0.312217
Year 2	CT18615	5	20.3	0.88	8.22	2.46959	0.52	144.751	39.8581	5.68436	135	57	93	216.55	32	13.5	2.945	67.4	146	66.7	0.235481
Year 2	CT19561	1	32.6	0.746	12	2.71667	0	0	30.7396	4.83806	125	65	73	165.38	24.5	8.5	1.505	65.7778	99	39.69	0.193544
Year 2	CT19561	2	34.1	1.36	13.9	2.45324	0.565	140.646	29.0191	3.92941	126	38	78	131.15	21	10	1.695	91.1597	81	43.35	0.248424
Year 2	CT19561	3	32.7	1.21	12.9	2.53488	0.458	151.891	30.4027	3.79726	127	37	80	108.78	24.5	8.5	1.58	86.2039	101.5	58.47	0.349596
Year 2	CT19561	4	33	0.744	8.74	3.77574	0.46	165.93	38.5764	5.50442	125	103	86	204.2	25.5	10.5	1.91	85.4231	107	96.92	0.321865
Year 2	CT19561	5	25.3	0.632	8.8	1.73864	0.385	157.41	20.5854	3.0658	147	40.2	62	84.28	21.5	10	1.195	64.3333	76.5	7.9	0.0857019
Year 2	CT6510	1	34.8	1.52	12.1	2.87603	0.529	165.151	32.3571	5.60884	153	60	74	181.34	10.5	5.5	0.22	-10	30	20.34	0.100853
Year 2	CT6510	2	31.3	1.59	13.3	2.35338	0.621	131.104	31.9603	4.33411	151	77	100	277.29	21.5	13.5	1.54	70.3388	201.5	43.13	0.134605
Year 2	CT6510	3	29.8	1.21	11.9	2.5042	0.558	137.306	28.5716	5.00577	163	55	60	196.03	10	5	0.255	44.4348	32	27.44	0.122791
Year 2	CT6510	4	31.6	0.929	10.4	3.03846	0.508	137.242	30.8956	4.7054	154	72	73	211.24	0	0	0	70	0	44.08	0.172646
Year 2	CT6510	5	19.7	0.442	9.67	2.03723	0.479	165.585	30.3643	3.511	164	98	79	277.88	22.5	12.5	1.19	50	191.5	37	0.117505
Year 2	CT6946	1	27.8	1.42	14.2	1.95775	0.66	166.3	46.8324	8.60399	126	36	79	125.97	26.5	11	2.53	82.3729	136	74.5	0.371627
Year 2	CT6946	2	31.8	1.14	12.9	2.46512	0.569	225.452	35.3084	5.62466	131	29	92	135.7	25	12.5	1.775	83.6667	105	43	0.240627
Year 2	CT6946	3	38.5	1.77	13.1	2.93893	0.601	141.756	43.2809	6.3458	140	52	83	184.71	25.75	11	2.53	83.8333	136	73.01	0.283292
Year 2	CT6946	4	25.2	0.686	8.62	2.92343	0.519	180.155	30.6515	4.75543	129	39	87	145.08	26.5	12.5	2.41	90.8529	120	42.45	0.226364
Year 2	CT6946	5	22	1.03	10.8	2.03704	0.529	144.033	31.1081	4.53249	152	42	88	191.84	26	11.5	1.275	55	110	44.73	0.189077
Year 2	FED 2000	1	33.9	1.42	12.5	2.712	0.545	171.614	37.7263	6.02551	153	61	118	224.8	28.5	11.5	1.835	77.6106	144.5	55.32	0.197487
Year 2	FED 2000	2	35.8	1.5	13.5	2.65185	0.558	204.604	37.446	5.07565	145	75	106	243.08	23.5	13.5	0.96	74.963	85.5	82.68	0.253806
Year 2	FED 2000	3	37.1	1.42	14.3	2.59441	0.613	187.046	29.8895	3.99485	148	120	113	397.22	29	12.5	1.835	34.9091	144.5	61.2	0.133502
Year 2	FED 2000	4	36.1	1.26	10.5	3.4381	0.527	151.947	37.3861	5.77311	145	73	104	185.42	27.5	13.5	2.08	46.8475	120	35.2	0.15955
Year 2	FED 2000	5	26.5	0.701	11.6	2.28448	0.438	126.775	29.6114	4.16792	154	63	99	234.18	24.5	12.5	1.22	55.7	75.5	45.2	0.161787
Year 2	FEDE 21	1	25.2	0.615	10.1	2.49505	0.568	204.964	56.4887	9.12035	121	81	89	289.29	23.8	13.5	1.93	74.9083	142.5	48.93	0.144669
Year 2	FEDE 21	2	34	1.19	13.1	2.59542	0.567	204.983	41.5096	6.8306	127	55	94	190.74	24.5	13.5	3.605	89.2603	185	121.17	0.388477
Year 2	FEDE 21	3	23	0.756	10.1	2.27723	0.535	132.675	33.0501	5.28208	145	44	102	203.24	24.5	13	1.74	79.8333	140	90.1	0.307152
Year 2	FEDE 21	4	24.1	0.489	7.38	3.26558	0.519	140.011	46.1531	7.81454	128	54	90	209.14	23.5	15.5	2.36	74.3019	160	78.56	0.273062
Year 2	FEDE 21	5	35.8	0.978	10.3	3.47573	0.513	112.95	35.8397	4.96938	144	69	112	309.47	25.5	12.5	3.105	78.4	179	88.6	0.222574
Year 2	FED 473	1	34	1.81	10.5	3.2381	0.542	130.508	30.7012	5.02405	120	73	90	242.94	22.25	10	1.98	85.1905	100.5	130.36	0.34921
Year 2	FED 473	2	37.2	1.3	14.2	2.61972	0.548	199.796	26.2916	3.51316	127	47	84	169.3	23	10	2.845	87.2381	121	95.85	0.361493
Year 2	FED 473	3	41	1.65	13.6	3.01471	0.538	128.144	39.05	5.72502	127	40	83	123.15	21.75	9.5	1.98	82.4956	100.5	52.29	0.298051
Year 2	FED 473	4	35.4	1.37	8.84	4.00452	0.464	133.102	37.2233	4.99465	125	46	91	161.16	26.3	10.54	1.66	87.4528	133.6	67.55	0.295352
Year 2	FED 473	5	26.7	0.795	10.3	2.59223	0.448	138.858	42.9316	5.37118	129	54	91	186.63	24	10	2.345	88.1504	111	61.9	0.249064
Year 2	FED CARE	1	33.2	2.35	11.8	2.81356	0.6	191.715	43.2605	6.37583	120	58	105	180.81	27.5	12	2.615	85	115.5	84.03	0.317286
Year 2	FED CARE	2	34.4	1.4	12.5	2.752	0.469	161.073	35.3458	5.01494	121	69	92	207.45	23.5	11	2.43	76.466	130	112.54	0.351698
Year 2	FED CARE	3	31.6	1.52	12.5	2.528	0.572	167.594	39.2546	5.47661	124	65	95	203.37	27.5	11.5	2.615	86.3077	115.5	130.92	0.391636
Year 2	FED CARE	4	29.4	0.73	8.21	3.581	0.487	175.566	38.1321	4.90033	118	56	82	156.42	23	11.5	2.3	90.4	133	80.37	0.339415
Year 2	FED CARE	5	22.4	0.9	8.48	2.64151	0.406	164.468	40.8992	5.98721	127	70	84	198.7	24.5	10	1.93	85.4	120	90.45	0.312813
Year 2	HHZ 12	1	22.3	0.895	10.8	2.06481	0.464	136.704	32.1718	5.41662	122	55	102	201.86	25.5	13.5	2.99	81.8571	174.5	101.07	0.333641
Year 2	HHZ 12	2	37.8	1.42	13.8	2.73913	0.493	175.769	40.0807	6.18515	126	62	95	216.49	24	15	2.16	73.1881	117	112.14	0.341235
Year 2	HHZ 12	3	35.4	1.75	12.8	2.76562	0.502	144.233	31.2346	4.12741	135	44	101	202.44	25.5	14.5	2.99	89.2941	174.5	67.69	0.250583
Year 2	HHZ 12	4	29	0.702	9.36	3.09829	0.501	189.068	108.84	6.53279	133	67	97	191.12	21.5	13.5	2.14	62.6667	116	51.84	0.213368
Year 2	HHZ 12	5	28.1	0.778	10.1	2.78218	0.398	111.147	16.5443	2.04955	136	40	104	182.6	25	14	1.66	78.4	114.5	88.6	0.326696
Year 2	HHZ 1	1	24	1.3	9.3	2.58065	0.578	131.637	23.0791	3.85159	115	61	87	118.22	23	10	1.99	164.455	99	76.73	0.393588
Year 2	HHZ 1	2	36	2.17	13.4	2.68657	0.572	132.556	40.0865	6.23966	118	41	89	145.61	23.5	12.5	1.96	81.3704	92	73.81	0.336387
Year 2	HHZ 1	3	29.3	1.39	14.2	2.06338	0.54	173.784	45.1482	6.83245	123	32	79	111.63	23	11	1.99	83	99	51.52	0.315783
Year 2	HHZ 1	4	28.9	0.765	8.6	3.36047	0.477	93.279	42.8221	6.39033	119	58	72	186.24	24.5	12.5	2.24	39.4783	117	49.6	0.210312
Year 2	HHZ 1	5	24.7	1.07	10.9	2.26606	0.515	132.768	34.627	5.457	128	32	91	153.81	24	22.1	1.46	87.4	82	55.6	0.265508
Year 2	IR04A115	1	28.4	0.784	10.3	2.75728	0.479	190.373	26.9201	4.35801	137	88.9	87	286.59	25.5	12.5	0.995	53.2	133.5	37.56	0.115872
Year 2	IR04A115	2	28.5	1.16	14.5	1.96552	0.6	133.4	32.5877	5.17503	142	85	87	165.12	25.5	14.5	1.67	88.3	113	55.6	0.251903
Year 2	IR04A115	3	36.3	1.55	13.1	2.77099	0.57	101.932	25.3726	3.32734	150	120	87	328.94	25.5	12.5	0.995	74.1587	133.5	59.73	0.153678
Year 2	IR04A115	4	35	1.31	9.39	3.72737	0.548	187.954	38.8375	5.96351	143	69	78	180.75	26.5	13.5	1.51	48.5088	117	38.74	0.1765
Year 2	IR04A115	5	25.2	0.8	9.02	2.79379	0.437	168.531	35.5097	5.07584	148	94.6	79	384.18	26.5	13.5	1.17	39.5	103	66.4	0.147366
Year 2	IR05F102	1	20.7	0.374	8.03	2.57783	0.469	115.045	29.6759	5.04274	123	43	58	189.3	30.5	11.5	2.075	86.3	106.5	68.08	0.264512
Year 2	IR05F102	2	26.4	0.957	12.8	2.0625	0.651	124.681	29.0496	4.40254	117	80	89	297	30	10.5	2.345	65.3	135.5	101.12	0.253994
Year 2	IR05F102	3	20.7	0.374	8.03	2.57783	0.469	115.045	50.3738	7.8141	117	108	89	362.12	30.25	10.5	2.075	42	106.5	91.96	0.202519
Year 2	IR05F102	4	22.6	0.391	7.08	3.19209	0.869	142.744	36.8312	5.3578	115	74	92	277.15	31	11.5	3.63	75.5825	152	131.65	0.32204
Year 2	IR05F102	5	28.7	0.854	10.6	2.70755	0.507	170.113	28.2166	4.71125	135	66	89	277.78	31	10	1.98	66.7	125.5	106.3	0.276765
Year 2	IR05N412	1	35.2	2.25	12.5	2.816	0.585	147.166	24.6628	3.84883	130	59	68	147.37	20.25	10.5	1.24	67.5194	67.5	58.2	0.283115
Year 2	IR05N412	2	35.2	1.85	12.6	2.79365	0.58	159.815	46.0309	7.59257	123	41	78	169.72	23	11	2.55	73.5688	117	54.31	0.242423
Year 2	IR05N412	3	34.3	1.3	12.7	2.70079	0.583	117.53	21.1936	3.33724	127	65	65	185.7	20	11	1.24	55.9	69	112.5	0.377264
Year 2	IR05N412	4	19.3	0.947	9.14	2.70308	0.472	173.077	28.7265	4.48874	124	35	75	98.78	22.5	11.5	2.52	85.4	109	50.14	0.336691
Year 2	IR05N412	5	24.8	0.777	12.2	2.03279	0.413	125.658	26.8827	3.59031	134	47	69	163.95	23.5	11	2.05	56.7	107	77.4	0.320696
Year 2	IR06N155	1	28.8	0.841	11.1	2.59459	0.602	221.641	35.3944	5.80436	143	75	89	306.48	27.5	10.5	0.73	49.66	125	34.6	0.101442
Year 2	IR06N155	2	25.5	0.606	9.65	1.60622	0.51	205.518	38.9119	5.91613	149	78	89	334.19	25	12.5	1.225	54	114.5	26.43	0.0732904
Year 2	IR06N155	3	36.6	1.18	13.5	2.71111	0.552	160.887	42.0928	6.22882	152	102	90	437.8	27.5	10.5	0.76	65.3	127.5	41.92	0.0873843
Year 2	IR06N155	4	36.1	1.22	9.26	3.89849	0.639	161.363	38.0835	5.89499	148	105	83	309.47	16.5	5.5	0.42	62.7	50	32.5	0.0950376
Year 2	IR06N155	5	29.6	0.797	7.78	2.51928	0.479	193.242	40.8658	5.9662	160	106	72	435.96	26	11.5	0.725	45.5	104.5	25.3	0.0548498
Year 2	IR07F102	1	24.3	0.887	10.7	2.27103	0.55	170.961	35.2914	5.99445	113	36	94	225.59	25.5	11	1.705	76.156	127.5	85.34	0.274467
Year 2	IR07F102	2	35.6	2	12.9	2.75969	0.514	191.594	25.2652	4.14447	118	49	112	236.46	26	13	3.05	91	158.5	114.34	0.325941
Year 2	IR07F102	3	35.5	1.56	12.6	2.81746	0.57	117.94	40.5105	5.94238	130	36	113	161.32	26	11	1.705	84.1515	127.5	61.96	0.277499
Year 2	IR07F102	4	24.5	0.604	7.25	3.37931	0.431	194.616	43.6946	7.84106	113	59	107	239.2	24.5	13.5	3.31	74.8507	173	118.35	0.331003
Year 2	IR07F102	5	23.4	0.645	9.31	2.51343	0.415	139.752	33.0375	4.05407	124	45	116	208.27	26	12	2.55	77.8	148.5	88.5	0.298211
Year 2	IR07F287	1	30.2	1.32	12.4	2.43548	0.563	144.428	46.1281	7.21679	90	84	87	164.3	23	10	2.025	77	149.5	152.68	0.481671
Year 2	IR07F287	2	30.9	0.934	14.7	2.10204	0.55	122.5	46.4672	7.17665	97	101	80	143.69	21	12.5	2.01	62.4	133.5	129.63	0.474279
Year 2	IR07F287	3	34.1	1.64	14.1	2.41844	0.538	135.035	46.5024	7.25433	96	76	77	145.29	23	10	2.025	73.7692	149.5	136.17	0.483799
Year 2	IR07F287	4	25.7	0.51	9.7	3.33766	0.477	197.407	46.3882	7.52765	92	63	77	127.17	23.5	13.5	2.25	74.0303	192.5	82.82	0.3944
Year 2	IR07F287	5	24.3	0.568	8.43	2.88256	0.483	179.056	44.8994	6.50396	100	47	78	120.89	22	11.5	1.51	68.3	123.5	125.6	0.509554
Year 2	IR07K142	1	18.4	0.8385	7.89	2.33207	0.495	208.351	45.4478	8.66662	87	85	76	182.94	22	13	2.99	69.7391	201.5	143.33	0.439299
Year 2	IR07K142	2	39.7	1.57	13.8	2.87681	0.628	113.25	40.4289	7.71991	92	36	77	73.68	17	11.5	1.845	86	133	80.82	0.523107
Year 2	IR07K142	3	43.5	2.22	14.1	3.08511	0.542	227.857	45.3528	7.7778	96	85	84	176.73	22	13	2.99	70.9231	201.5	136.17	0.435187
Year 2	IR07K142	4	28.1	0.614	7.93	3.54351	0.437	151.859	59.8502	10.4274	90	78	79	161.27	22.5	12.5	2.72	81.8407	173	127.7	0.441914
Year 2	IR07K142	5	19.6	0.8299	7.44	2.63441	0.455	138.435	54.8836	8.03415	97	75	67	158.62	18	11	1.345	77.5	126.5	90.2	0.362511
Year 2	IR08A172	1	35.3	1.32	11.8	2.99153	0.541	159.282	40.0887	6.33936	87	52	88	96.24	23	14	2.36	77.8	186.5	107	0.526471
Year 2	IR08A172	2	40.6	2.16	15	2.70667	0.581	114.664	53.1508	8.5035	92	84	85	149.67	21.5	13	3.13	65.7899	191	121.8	0.448668
Year 2	IR08A172	3	36.1	1.14	13.4	2.69403	0.495	122.204	32.6465	5.8248	96	71	78	123.64	23	14	2.36	89.1613	186.5	101.69	0.451294
Year 2	IR08A172	4	35.9	1.25	10.97	4.00223	0.509	148.721	52.2093	7.94628	89	70	78	99.16	23.5	13	3.87	84.1473	293	109.51	0.5248
Year 2	IR08A172	5	30.1	1.36	15	2.00667	0.518	145.502	38.2134	5.84279	97	52	82	126.42	22.5	12	2.63	77.3	188	99.6	0.440669
Year 2	IR08N136	1	38.3	1.84	10.2	3.7549	0.532	189.986	49.6039	8.01436	89	92	78	214.26	22	12.5	4.225	76.5	225	133.95	0.384682
Year 2	IR08N136	2	36.3	2.36	14.1	2.57447	0.681	94.131	39.5665	6.2345	90	79	86	149.4	20.5	11	2.4	77.4	131.5	88.2	0.371212
Year 2	IR08N136	3	45.9	2.28	13.9	3.30216	0.546	182.736	46.3294	8.36023	98	43	85	107.68	21.5	13	4.225	74	225	72.51	0.402409
Year 2	IR08N136	4	41.5	1.57	8.54	4.85948	0.566	170.023	50.4823	8.43079	91	49	79	111.52	23.5	12	3.51	76.9524	179	84.35	0.430643
Year 2	IR08N136	5	26.8	0.914	9.16	2.34637	0.51	206.595	42.5788	5.98969	99	45	84	141.94	20.5	10.5	1.9	63.1157	129	63.9	0.310435
Year 2	IR09A130	1	36.9	1.16	13.6	2.71324	0.595	170.078	33.8469	4.94422	95	47	86	126.46	21.5	11	2.495	82.638	196.5	91.25	0.419136
Year 2	IR09A130	2	28.6	1.42	13.8	2.07246	0.547	131.144	47.0188	8.53779	98	85	84	175.42	22	12.5	2.95	86.8333	169	169.23	0.49102
Year 2	IR09A130	3	31	1.01	12.3	2.52033	0.527	159.986	39.4874	8.00226	104	80	80	139.96	20.75	12	2.495	88.3	196.5	88.9	0.388447
Year 2	IR09A130	4	31.1	1.4	9.66	3.21946	0.495	190.368	43.9862	6.92361	98	61	79	133.79	22.5	12	2.65	84.2562	177	107.33	0.445131
Year 2	IR09A130	5	34.8	0.802	13.4	2.59701	0.466	99.297	29.4902	2.7651	105	58	79	133.23	22.5	12	2.45	78.2	159	93.6	0.412644
Year 2	IR09F436	1	28.9	2.1	12.3	2.34959	0.55	183.632	31.6506	5.22387	92	20	80	91.49	24.5	14.5	3.18	67.3585	171.5	43.89	0.324199
Year 2	IR09F436	2	31.9	1.36	13.3	2.3985	0.56	193.952	23.3344	3.60026	97	19	81	77.48	19.5	11.5	1.315	63.4286	126.5	22.18	0.222557
Year 2	IR09F436	3	34.2	1.28	13.6	2.51471	0.605	133.945	51.5006	8.47172	97	19	71	76.57	24.5	15	3.18	76.5243	171.5	39.58	0.340766
Year 2	IR09F436	4	22.7	0.725	8.98	2.52784	0.463	192.436	30.9115	6.88972	88	19	77	79.01	19.5	11.5	1.51	91.3964	141	38.24	0.326141
Year 2	IR09F436	5	29.5	0.906	10.3	2.86408	0.459	185.388	22.3589	2.72005	92	28	79	115.3	20.5	11	1.33	69.4	116.5	41.3	0.263729
Year 2	IR09L179	1	19.9	1.4	12.3	1.61789	0.576	152.564	27.0568	5.08576	97	12	67	54.46	20	10	1.205	81.0891	85.5	33.2	0.378736
Year 2	IR09L179	2	19.2	1.32	9.2	1.92105	0.613	134.768	36.5665	5.75722	87	22	74	96.07	21.5	13	1.635	46.4516	141	37.83	0.282524
Year 2	IR09L179	3	17.7	0.711	9.01	1.96448	0.55	139.63	29.5783	3.29583	100	10	62	54.85	20	10	1.405	90.6102	85.5	42.3	0.435409
Year 2	IR09L179	4	20.5	0.584	7.57	2.70806	0.438	164.862	21.8877	3.40796	101	9.55	62	42.06	22	11.5	2.16	93.3684	95	23.1	0.354512
Year 2	IR09L179	5	21.7	0.928	7.98	2.7193	0.38	147.604	42.6241	6.26881	102	14	78	78.84	22.5	12	1.135	65.3	139	44.6	0.361309
Year 2	IR09L324	1	25.1	0.512	8.09	3.1026	0.531	133.796	38.2678	6.41124	88	81	64	168.92	19	9.5	1.31	51.2276	84.5	103.07	0.378948
Year 2	IR09L324	2	31.3	1.15	11.6	2.69828	0.499	207.343	28.5441	2.60333	96	89	79	158.8	20	14	2.925	53.8644	189	89	0.359161
Year 2	IR09L324	3	31.6	1.35	13.2	2.39394	0.48	116.616	34.7568	6.08695	97	87	81	156.3	12.5	9.5	1.41	75.7586	87	139.57	0.471727
Year 2	IR09L324	4	36.7	1.03	9.48	3.87131	0.477	177.687	47.5581	7.82683	90	74	81	140.61	21.5	12.5	2.82	73.6119	168	90.75	0.392246
Year 2	IR09L324	5	25.5	0.512	9.66	2.63975	0.527	141.473	47.5048	7.15738	100	48	92	128.14	20.5	13	2.425	65.3	179	87.4	0.405493
Year 2	IR09L337	1	38.4	1.61	11.8	3.25424	0.617	181.325	37.5849	6.65084	88	76	78	158.12	20.5	10.5	1.825	64.8929	89	103.93	0.396604
Year 2	IR09L337	2	42.3	2.16	14.2	2.97887	0.615	144.728	35.8825	4.74666	93	72	84	124.65	19	11	2.39	52.7391	132.5	114.64	0.479084
Year 2	IR09L337	3	45.2	2.05	13.2	3.42424	0.57	166.75	55.1233	9.12278	99	53	87	117.72	20.5	10.5	1.825	64.8955	85	71.66	0.378393
Year 2	IR09L337	4	20.4	0.318	10.96	3.42282	0.503	161.588	46.4266	7.64338	96	53	80	97.19	17.5	11	1.43	76.6667	133	72.36	0.426777
Year 2	IR09L337	5	33.9	0.814	9.87	3.43465	0.217	65.685	30.1097	2.4417	98	104	81	209.72	20	11	1.89	0	122.5	0	0
Year 2	IR09N537	1	30.3	1.31	11.3	2.68142	0.528	190.032	31.5433	4.50618	117	83	84	215.1	26.5	12	2.06	70	109.5	122.45	0.362761
Year 2	IR09N537	2	27.3	1.39	12.2	2.2377	0.6	157.568	32.5098	6.0678	122	63	87	180.7	25	12	2.54	81.3509	124	97	0.349298
Year 2	IR09N537	3	36.1	1.19	11.5	3.13913	0.511	214.678	32.616	4.22351	127	72	83	198.5	26	12	2.06	60.6667	109.5	103.75	0.343259
Year 2	IR09N537	4	21.8	0.961	9.33	3.44392	0.503	133.15	26.1356	3.6983	122	81	70	181.32	24.5	11.5	2.14	85.3704	107	88.82	0.328792
Year 2	IR09N537	5	29.6	1.21	11.6	2.55172	0.555	155.589	34.4551	5.29437	133	35	80	113.32	26	11	2.04	78.4	114	99.3	0.46703
Year 2	IR10A134	1	29.1	0.976	8.78	3.31435	0.575	208.941	27.917	4.41192	93	17	83	87.12	23.5	12.5	2.7	80.8919	165	39.43	0.311576
Year 2	IR10A134	2	30.6	1.49	11.1	2.75676	0.527	189.361	30.5666	6.02266	99	13	78	90.01	23	12	2.47	87.0784	149.5	31.82	0.261184
Year 2	IR10A134	3	23.5	1.94	14.7	1.59864	0.517	168.747	27.9192	5.60043	101	23	91	101.5	24	12	2.55	88.0355	165	70.4	0.40954
Year 2	IR10A134	4	29.8	0.848	9.53	3.12697	0.488	191.997	38.1706	6.35412	96	17	85	74.72	21.5	11.5	1.23	92.2963	118.5	16.52	0.181061
Year 2	IR10A134	5	24.8	0.853	13.6	1.82353	0.45	156.3	33.6739	5.4598	103	13	76	90.18	24	11	1.97	77.3	145.5	22.4	0.19897
Year 2	IR10N230	1	34.9	2.73	12.7	2.74803	0.535	172.187	25.6337	3.74707	125	42	73	138.75	28	14	2.915	75	151	90.94	0.395925
Year 2	IR10N230	2	36.4	2.55	14	2.6	0.542	196.651	25.9728	3.36586	124	42	84	137.79	25	12	2.64	87.6387	137	53.83	0.280921
Year 2	IR10N230	3	36.5	2.24	14.3	2.55245	0.559	216.89	32.6929	5.53066	124	28	78	116.6	27	14.5	2.915	71.037	151	65.14	0.358424
Year 2	IR10N230	4	34.4	1.81	8.85	3.88701	0.523	226.772	39.7971	7.36175	125	45	75	142.87	25	13.5	2.24	83.037	123	59.22	0.293038
Year 2	IR10N230	5	32.7	0.722	11.3	2.89381	0.328	95.407	40.0321	6.39271	130	64	87	242.77	25.5	11.5	2.14	0	127	0	0
Year 2	IR49830	1	33.7	1.53	13.4	2.51493	0.655	151.855	18.6006	6.36945	81	13	74	63.09	21.5	11.5	2.155	79.5652	150.5	73.5	0.538107
Year 2	IR49830	2	33.1	1.07	11.4	2.90351	0.595	176.336	42.6603	8.68546	87	25	76	115.83	18.5	10	1.985	73.1782	99.5	81.74	0.413727
Year 2	IR49830	3	33.7	1.53	13.4	2.51493	0.655	151.855	41.2677	5.82594	89	27	81	111.73	21.75	12	2.155	80.8261	150.5	94.74	0.458856
Year 2	IR49830	4	16.8	0.93	6.93	2.42424	0.509	156.028	21.9374	3.96518	81	13	72	41.86	16.5	8	1.05	95	69	56.8	0.575715
Year 2	IR49830	5	22.5	1.03	13.6	1.65441	0.54	125.65	17.2598	2.0417	107	11	68	68.47	19	9	1.485	88.6	89.5	66.7	0.493453
Year 2	IR6-PAK	1	31.8	0.855	10.8	2.94444	0.498	203.88	56.4198	9.94827	104	39	79	145.89	23	11	2.48	70.1429	160	80.33	0.355097
Year 2	IR6-PAK	2	29.3	1.47	14	2.09286	0.546	133.731	32.5718	5.73241	109	30	116	134.55	25	13.5	3.24	70.4	183	73.8	0.354212
Year 2	IR6-PAK	3	27.9	1.61	13.1	2.12977	0.555	131.675	29.5776	5.75566	113	25	87	86.29	22.25	11	2.48	86.7536	160	56.7	0.396531
Year 2	IR6-PAK	4	33.8	0.975	8	4.225	0.541	170.298	39.5258	5.678	112	42	85	164.52	26.5	12.5	4.45	73.5714	209.5	76.14	0.31638
Year 2	IR6-PAK	5	27.8	0.663	11.7	2.37607	0.58	160.946	22.9003	2.909	119	31	89	139.62	26	12.5	2.74	77.3	173	55.6	0.284807
Year 2	IR64-NIL	1	33.2	2.2	11.7	2.83761	0.588	157.712	41.3537	6.20241	120	100	92	275.52	25.5	9.5	2.52	56.6667	130.5	130.27	0.321028
Year 2	IR64-NIL	2	41.1	1.99	14.2	2.89437	0.539	162.226	34.9026	5.215	121	55	97	177.56	23	10.5	2.165	80.0734	104.5	100.9	0.36235
Year 2	IR64-NIL	3	31.6	1.28	12.9	2.44961	0.505	131.987	24.3292	4.89252	123	77	88	257.08	25.5	9.5	2.52	67.7826	132.5	108.4	0.296596
Year 2	IR64-NIL	4	20.9	0.705	9.34	3.29653	0.523	155.428	48.8082	8.04132	112	84	94	264.64	24.5	10.5	3.28	81.7257	153	130.46	0.330195
Year 2	IR64-NIL	5	24	0.417	9.11	2.63447	0.493	146.818	34.429	5.37483	121	38	89	175.39	24	10	1.665	87	94.5	59.94	0.254706
Year 2	IR65482	1	35.3	1.71	10.2	3.46078	0.363	128.198	51.1604	8.32427	144	50	88	234.09	22.8	10.8	2.1	55.4	126.7	44.6	0.160034
Year 2	IR65482	2	33.8	2.26	15.2	2.22368	0.56	158.642	40.2345	6.49063	148	34	101	144.26	24.5	12	2.87	55.4	131	37.96	0.20832
Year 2	IR65482	3	38.9	1.28	12.9	3.0155	0.603	165.347	53.5917	8.70224	154	55	83	272.42	12.9	13.2	1.66	78.6	132.7	25.16	0.0845487
Year 2	IR65482	4	41.7	1.72	11.9	3.5042	0.514	157.234	58.2824	9.13812	139	61	105	242.73	25.5	11.5	1.16	53.2727	100	58.57	0.194391
Year 2	IR65482	5	26.9	0.574	11.1	2.42342	0.465	150.05	35.5391	5.0203	126	33	81	130.12	25.5	11	2.37	63.9	122	44.6	0.255266
Year 2	IR65600	1	39	2.86	12.6	3.09524	0.617	131.655	28.6721	4.39255	158	48	77	203.6	11.5	3.5	1.11	24.3	36	15.35	0.0701073
Year 2	IR65600	2	29.7	1.87	14	2.12143	0.61	218.603	34.0649	4.76476	157	41	76	165.86	10.3	7.6	0.66	44.3	64.9	18.84	0.102003
Year 2	IR65600	3	35	1.49	13.4	2.61194	0.45	157.463	23.0281	4.48601	150	25	84	141.96	11	4	1.05	44.3	41	17.48	0.109634
Year 2	IR65600	4	38.2	1.75	9.54	4.00419	0.484	164.199	42.1979	6.45326	146	31	78	117.12	23.75	11.5	1.14	42.7	71	15.57	0.117341
Year 2	IR65600	5	33.3	0.873	12	2.775	0.576	101.335	43.8426	5.92752	156	54	78	242.58	12.3	6.8	0.87	51.2	67.7	20.5	0.0779231
Year 2	IR70213	1	31.9	2.34	14	2.27857	0.485	87.786	30.934	6.21165	144	58	101	276.4	14.5	6.5	1.09	15	83.5	36.46	0.116538
Year 2	IR70213	2	37.2	1.87	13.5	2.75556	0.352	136.04	48.538	8.04064	159	107	86	404.18	24	10.5	1	25.5	74	21.89	0.0513765
Year 2	IR70213	3	26.7	0.631	10.2	2.61765	0.51	213.611	38.9245	5.88479	163	71	78	239.43	14	7	1.34	44.7	88.5	21.67	0.082995
Year 2	IR70213	4	28.8	0.786	11.6	2.48276	0.454	132.194	43.889	7.29939	145	51	94	222.54	27.5	13.5	2.09	54.0164	114	33.33	0.130261
Year 2	IR70213	5	27.7	0.619	11.1	2.4955	0.444	145.111	44.8124	7.13365	154	62	86	255.89	25	9.5	0.62	29.3	64	29.8	0.104309
Year 2	IR74371	1	32.7	1.71	14	2.33571	0.579	108.848	45.3042	7.0671	147	44	71	166.15	24	11.5	0.76	22.2	93	10.85	0.0612994
Year 2	IR74371	2	39.8	1.33	13.2	3.01515	0.46	164.14	49.9622	8.67488	147	87	91	420.02	24.5	11	1.26	22.6	106	55.53	0.11677
Year 2	IR74371	3	36.6	1.72	12.8	2.85938	0.483	199.524	54.5434	8.6738	150	74	82	289.5	24.5	12.5	0.74	27.4	94	20.81	0.067062
Year 2	IR74371	4	36.1	1.14	10.7	3.37383	0.589	126.562	49.5553	7.50043	145	49	80	121.73	22.4	10.5	1.19	33.2	88.6	14.82	0.108532
Year 2	IR74371	5	30.6	0.792	10.3	2.97087	0.513	120.586	45.8536	6.62317	137	59	77	235.04	25.5	10	0.76	21.3	96	15.97	0.063623
Year 2	IR75483	1	31.3	1.18	12.3	2.54472	0.551	257.723	49.5948	8.34159	137	79	91	324.08	26	11.5	1.2	27	121	44.9	0.121687
Year 2	IR75483	2	33.1	2.33	13.9	2.38129	0.6	172.618	28.5926	1.72673	145	34	105	203.2	19.7	7	1.71	60.1589	75	46.62	0.186614
Year 2	IR75483	3	35.6	2.26	13.8	2.57971	0.549	221.1	46.7849	9.35334	149	58	91	272.31	27	11	1.1	40	121	45.13	0.142169
Year 2	IR75483	4	31.1	0.759	12.3	2.52846	0.344	102.247	59.1641	10.3272	154	56	74	233.55	22.7	12.2	1.22	33.6	88.5	33.8	0.126426
Year 2	IR75483	5	28.8	0.805	11	2.61818	0.349	143.444	18.9803	2.16326	161	62	76	247.71	18.3	13.2	1.46	52.8	70	39.7	0.13813
Year 2	IR78049	1	26.9	1.23	12	2.24167	0.497	213.837	36.8367	6.44005	127	38	75	94.29	23	12.5	1.96	62.8333	95.5	34.7	0.269013
Year 2	IR78049	2	27.7	2.06	14.7	1.88435	0.583	193.937	41.9096	6.92338	131	29	91	152.37	25.25	16.5	3.755	79.4	171	55.4	0.266641
Year 2	IR78049	3	26.7	1.93	14.3	1.86713	0.523	179.972	36.6637	5.47327	134	19	80	68.49	22.5	12.5	1.96	71.125	101	28.12	0.291067
Year 2	IR78049	4	28.1	0.645	10	2.81	0.49	141.878	45.3981	8.21434	125	44	86	151.11	22.5	13.5	3.05	91.4286	128	83.06	0.3547
Year 2	IR78049	5	26.4	0.772	11.5	2.29565	0.441	133.317	38.5797	5.52935	142	41	88	168.85	25.5	16	3.255	79	161	55.4	0.247046
Year 2	IR78221	1	27.3	1.11	11.8	2.31356	0.484	150.396	48.295	8.09461	123	30	94	174.04	27.5	11.5	2.245	0	127.5	55.4	0.241457
Year 2	IR78221	2	41.6	2.54	14.1	2.95035	0.482	202.397	53.0909	8.63688	122	67	92	242.31	27.5	13.5	3.66	82.7293	153.5	136.15	0.359747
Year 2	IR78221	3	35.9	1.92	13.8	2.60145	0.492	131.433	36.7598	5.94624	132	24	84	106.9	27.5	12.5	2.245	65.4771	127.5	45.05	0.296479
Year 2	IR78221	4	36.5	1.18	14.7	2.48299	0.48	170.393	41.4781	6.14365	124	45	84	163.47	27.5	14.5	2.99	84.3204	136	51.94	0.241122
Year 2	IR78221	5	36.2	1.61	14.4	2.51389	0.406	158.636	45.6443	6.55956	127	68	86	227.77	28	12.5	3.16	80	143.5	92.7	0.289263
Year 2	IR78222	1	28.4	0.68	10.5	2.70476	0.506	192.739	54.592	8.9516	120	49	91	252.27	28.5	13.5	2.435	48.9375	159	55.7	0.180862
Year 2	IR78222	2	33.3	1.75	13	2.56154	0.655	120.758	44.5694	6.91214	127	47	99	178.04	25.5	13	3.04	78.963	148.5	79.77	0.309414
Year 2	IR78222	3	40.9	1.55	14.6	2.80137	0.634	129.408	44.375	7.00779	126	51	97	194.52	28	13.5	2.435	74.5085	163.5	78.48	0.287473
Year 2	IR78222	4	36.2	1.01	9.66	3.74741	0.45	176.78	52.7192	8.05172	119	59	96	214.74	28.5	14.5	3.08	90.2857	235	96.98	0.311113
Year 2	IR78222	5	33.7	0.693	10.9	3.09174	0.249	78.812	28.0548	3.81866	131	58	91	241.46	26.5	12	2.54	59.5	138.5	40.5	0.143637
Year 2	IR85411	1	31	2.2	13.7	2.26277	0.564	170.285	35.1299	5.82756	122	80	84	300.32	25.5	13.5	2.245	79.4	101	136.15	0.311934
Year 2	IR85411	2	27.3	0.873	9.71	2.81153	0.542	168.485	34.7728	5.29344	132	140	86	357.74	28.5	14.5	2.99	71.125	128	45.05	0.111845
Year 2	IR85411	3	29.8	1.15	12.3	2.42276	0.528	154.655	28.7874	4.39865	142	47	91	157.31	25.25	12.5	3.755	78.963	127.5	55.4	0.260448
Year 2	IR85411	4	20.5	0.272	5.88	3.48639	0.467	178.27	19.5105	3.01264	134	55	92	182.94	22.5	13.5	3.04	79	101	28.12	0.133232
Year 2	IR85411	5	28.5	0.523	10.1	2.82178	0.604	115.485	31.4834	5.08557	125	102	84	289.3	28.5	16.5	3.755	84.3204	153.5	83.06	0.223064
Year 2	IR85422	1	41.1	2.91	13.2	3.11364	0.536	132.759	36.2376	4.73945	97	50	90	128.61	24.4	10.5	2.175	80.9091	121	88.77	0.408363
Year 2	IR85422	2	34.5	0.837	14.6	2.36301	0.538	140.691	38.4418	6.67357	102	35	88	113.55	23.5	11.5	3.025	89.0149	144	55.84	0.329653
Year 2	IR85422	3	23.9	1.22	12.3	1.94309	0.523	194.27	38.3864	6.29796	105	24	74	112.4	25	11.5	2.175	84.3793	122	34.82	0.236517
Year 2	IR85422	4	21.8	0.737	7.22	3.01939	0.537	169.35	55.3347	8.29002	97	30	85	107.34	24.5	11.5	2.02	69.6269	143	32.78	0.233942
Year 2	IR85422	5	17.1	0.508	9.34	1.83084	0.475	162.861	30.1948	0.570919	106	24	59	82.09	23.5	10.5	2.525	79.9	134	65.7	0.44455
Year 2	IR85427	1	18.4	0.65	8.32	2.21154	0.522	131.404	25.4284	4.32809	134	39	138	260.28	29.5	11.5	3.1	46.5	195	77.3	0.228983
Year 2	IR85427	2	24.8	0.882	10.7	2.31776	0.615	147.356	18.3304	3.77137	140	52	130	297.11	26	12.5	2.16	41.4202	159	46.54	0.135428
Year 2	IR85427	3	29.6	1.11	12.5	2.368	0.574	142.886	50.862	7.91081	148	39	134	259.2	29.5	11.5	3.1	64.297	195	100.07	0.278537
Year 2	IR85427	4	16.8	0.652	8.32	3.15789	0.5	196.036	31.8508	6.92745	142	88	113	467.67	22	11.5	1.97	45.6	119.5	56.3	0.107449
Year 2	IR85427	5	24.3	0.598	9.66	2.51553	0.465	89.792	26.8138	4.24769	149	61	91	261.52	26	12.5	1.66	55.3	149	49.2	0.158342
Year 2	IR86052	1	22	0.569	9.21	2.38871	0.566	162.465	23.0225	4.45591	96	22	97	114.65	21.5	11	1.625	58.4286	100.5	77.8	0.404261
Year 2	IR86052	2	35.8	1.27	12.9	2.77519	0.503	137.826	44.5186	8.30559	100	50	108	212.34	23	12.5	1.625	49.1967	61.5	116.79	0.354845
Year 2	IR86052	3	22.8	0.827	10.8	2.11111	0.552	179.933	45.6342	7.78708	123	49	81	163.94	21.75	11.5	1.625	86.2886	108	71.17	0.302709
Year 2	IR86052	4	27.8	0.726	9.56	2.90795	0.558	164.188	37.5432	6.54954	100	46	108	142.23	25.5	14.5	1.04	84.4366	102	66.76	0.319441
Year 2	IR86052	5	26.9	0.505	9.69	2.77606	0.411	147.777	38.9855	5.24374	165	78	63	305.88	24	11.5	1.125	77.4	49.5	75.6	0.198176
Year 2	IR86126	1	26.2	0.77	9.21	2.84473	0.548	186.077	32.8782	6.77233	112	47	106	238.45	28.5	11	1.865	83.0171	99.5	41.57	0.148454
Year 2	IR86126	2	38.3	1.23	13.3	2.8797	0.554	167.865	39.3518	5.24513	123	86	100	271.24	23	12	2.25	91	52	54.96	0.168486
Year 2	IR86126	3	34	0.944	11.7	2.90598	0.574	135.128	34.4471	5.21887	120	57	115	279.18	28.5	11	1.7	79.1111	99.5	88.7	0.241111
Year 2	IR86126	4	21.9	0.464	9.33	2.98772	0.499	190.486	39.2647	6.30772	118	47	90	182.19	27	10.5	2.9	93.2477	125	64.57	0.261671
Year 2	IR86126	5	26.9	0.766	13	2.06923	0.478	118.547	26.8181	3.98984	127	55	117	261.17	24	11	1.75	77.9	67.2	63.8	0.196326
Year 2	IR86174-1	1	33.8	0.944	11.3	2.99115	0.581	211.687	62.3109	8.42788	98	56	82	179.52	22	14.5	2.72	77.5	175.5	78.4	0.30397
Year 2	IR86174-1	2	38.6	2.15	14	2.75714	0.498	192.977	40.698	6.03753	101	45	93	163.98	20	14.5	3.24	82.8333	172.5	83.9	0.33847
Year 2	IR86174-1	3	41.1	1.71	14.9	2.75839	0.463	189.721	29.9777	5.03511	108	41	87	109.58	21.5	14.5	2.72	86.0693	176.5	93.67	0.460861
Year 2	IR86174-1	4	21.3	0.909	6.19	3.44103	0.468	152.201	42.7485	6.57735	102	58	76	135.03	18.25	9	1.38	82.5	84	96.7	0.417296
Year 2	IR86174-1	5	25.9	0.456	9.1	2.84615	0.544	143.215	33.9956	2.96941	106	66	87	190.72	20.25	13.5	2.74	78.4	164	76.8	0.287081
Year 2	IR86174-2	1	21.4	0.747	9.72	2.20165	0.518	179.279	19.3556	4.23805	108	35	100	77.39	25.5	11.5	1.895	66.7	98	77.3	0.499709
Year 2	IR86174-2	2	32.5	1.39	12.2	2.66393	0.61	170.921	24.2897	3.13308	112	31	112	129.38	29	15	4.04	87.6667	196.5	89.49	0.408873
Year 2	IR86174-2	3	22.3	0.613	9.06	2.46137	0.472	127.335	36.3134	5.45234	116	66	83	202.74	25.5	11.5	1.895	73	98	66.96	0.248276
Year 2	IR86174-2	4	23.3	0.794	7.22	3.22715	0.458	188.157	34.1726	6.18631	112	55	86	198.26	25.5	15.5	3.94	92.3214	188	90.65	0.313766
Year 2	IR86174-2	5	19.1	0.413	7.73	2.47089	0.527	144.226	39.5665	6.10332	117	43	110	197.12	30	14	3.54	87.3	186.5	67.3	0.254519
Year 2	IR86174-3	1	25.6	1.8	10.2	2.5098	0.618	148.492	23.9698	4.33302	95	32	83	103.09	26	12.5	1.54	55.6	96.5	39.7	0.278031
Year 2	IR86174-3	2	29.8	1.29	14.1	2.11348	0.565	173.18	35.2123	5.6633	101	27	89	113.88	22.5	11.5	1.55	73.0345	107	29.4	0.205193
Year 2	IR86174-3	3	30	0.945	11.4	2.63158	0.448	131.345	32.1119	4.84161	106	35	82	119.24	26	12.5	1.71	84.678	96.5	27.25	0.18602
Year 2	IR86174-3	4	25.5	0.621	9.17	2.78081	0.387	197.422	32.0746	4.62488	101	35	91	99.79	24.5	10.5	1.66	84.9083	90	55.59	0.357768
Year 2	IR86174-3	5	20.6	0.669	8.04	2.56219	0.552	179.621	31.2459	4.67385	114	23	79	97.89	23.5	10.5	1.05	77.6	97	55.4	0.361406
Year 2	IR86635	1	27.6	2.61	12.4	2.22581	0.567	189.596	36.4704	5.66469	169	62	77.3	366.69	9.5	9	0.16	66.5	10	12.82	0.0337804
Year 2	IR86635	2	24.2	1.29	11.2	2.16071	0.491	149.018	24.1925	4.6895	164	14	82	50.08	13.4	8	0.385	77.6	20.5	2.8	0.0529501
Year 2	IR86635	3	25.4	0.506	9.33	2.7224	0.463	77.735	39.6796	5.72112	170	55	78	216.63	9	11.4	1.11	51.2	11.5	20.2	0.0852932
Year 2	IR86635	4	24.3	0.845	7.44	3.26613	0.501	177.321	34.4642	5.36069	160	47	83	235.34	22.5	11.5	2.23	88.4	116.5	20.51	0.0801642
Year 2	IR86635	5	20.2	0.785	8.31	2.43081	0.487	111.614	30.501	4.47488	156.7	35	76.2	266.42	12	9.33	1.44	93.5	15.5	32.6	0.109023
Year 2	IR88633	1	26.1	0.928	15	1.74	0.66	133.5	41.288	6.68795	122.2	73	88.7	264.39	21.2	9.77	1.22	87.6	110.3	89.5	0.252903
Year 2	IR88633	2	30	1.57	11.9	2.52101	0.598	166.907	43.1848	7.78809	124.3	97	76.8	243.25	12.3	11.2	1.1	94.6	92.4	93.7	0.278083
Year 2	IR88633	3	27	0.637	10.5	2.57143	0.464	147.707	35.5583	5.51107	121.2	74	98.7	254.91	15.3	10.5	1.02	76.4	84.3	76.8	0.231528
Year 2	IR88633	4	27.4	0.493	8.57	3.1972	0.409	114.316	30.5372	4.91068	122	83	87	207.83	22.5	6.33	2.1	87.9688	82.4	85.5	0.291481
Year 2	IR88633	5	29.2	0.536	10.4	2.80769	0.386	138.057	43.5623	6.48626	118.6	71	76.5	311.3	15.3	8.43	1.4	78.8	77.3	66.7	0.176455
Year 2	IR93323	1	31.5	1.81	13.7	2.29927	0.537	162.553	28.6133	5.74985	143	22	97	69.25	24.5	11.5	2.465	88.0769	134	37.11	0.348909
Year 2	IR93323	2	33.9	1.93	13.1	2.58779	0.573	136.377	36.7881	5.06032	132	40	110	195.57	25	15	2.975	81.4762	133	89.7	0.314439
Year 2	IR93323	3	34.6	1.36	11.8	2.9322	0.537	177.335	39.0703	6.27219	145	41	108	221.38	25	10.5	2.465	87.6364	137	110.11	0.332167
Year 2	IR93323	4	31.6	0.927	9.47	3.33685	0.475	203.987	26.165	3.14427	139	45	105	220.01	24.5	13.5	1.68	89.578	124	66.82	0.23296
Year 2	IR93323	5	29	0.92	12.4	2.33871	0.565	143.25	23.4102	3.14563	147	47	60	107.27	24.95	15	2.475	80	124.5	77.6	0.419754
Year 2	IR93324	1	25.5	2.38	11.7	2.17949	0.548	197.077	29.3503	4.9157	153.4	54	77.6	233.69	24.2	11	1.11	77.6	134	38.6	0.141761
Year 2	IR93324	2	29.1	1.45	12.7	2.29134	0.582	127.379	38.9278	6.72304	155.4	83	76.5	481.76	21.3	9.43	1.43	67.5	122	53.4	0.0997832
Year 2	IR93324	3	23.3	0.688	9.94	2.34406	1.04	148.181	51.0542	9.06663	144.3	70	49.7	466.16	21.32	9.43	1.22	67.5	109	54.3	0.104331
Year 2	IR93324	4	24.2	0.382	7.99	3.02879	0.44	133.3	32.5007	4.55849	159	60	65.4	307.18	20.5	10.5	2.1	77.6	135	44.3	0.126038
Year 2	IR93324	5	22.2	0.378	8.5	2.61176	0.425	177.884	52.4657	7.89567	133.4	62	48.6	335	20.5	11.4	1.05	55.4	133.6	44.3	0.116794
Year 2	IRRI 123	1	25.7	1.18	8.72	2.94725	0.586	168.226	28.679	4.5297	155	63	70	207.92	22.3	10.5	1.22	76.5	123.3	55.4	0.21039
Year 2	IRRI 123	2	27.5	2.23	14.2	1.93662	0.613	139.406	30.6141	4.48622	123.3	44	76.5	182.25	23.4	9.4	1.12	77.6	125.3	44.3	0.195542
Year 2	IRRI 123	3	28.8	1.34	13.2	2.18182	0.55	151.617	34.2934	6.06779	153	61	67	196.88	44.3	9.44	1.05	47.6	143.2	72.4	0.268865
Year 2	IRRI 123	4	32.9	1.44	11.2	2.9375	0.501	208.943	37.0888	5.21929	127.5	74	48.6	326.03	19.4	10.4	1.03	55.4	145.3	29.6	0.0832326
Year 2	IRRI 123	5	34.8	1.29	13.2	2.63636	0.471	130.852	46.1191	7.55714	164	77	72	179.61	22.1	10.1	2.02	77.5	118.6	54.5	0.232797
Year 2	IRRI 152	1	23.2	0.452	8.48	2.73585	0.537	213.722	35.1017	6.28497	116	72	130	352.85	24	19.5	1.06	55.7	116.4	66.7	0.15898
Year 2	IRRI 152	2	31.7	1.48	12.6	2.51587	0.567	155.318	34.9034	5.65636	144	55	138	336.18	28	15	0.33	54.7	90	67.4	0.167005
Year 2	IRRI 152	3	28.4	1.05	10.7	2.65421	0.546	221.446	37.8021	5.38722	123	62	120	359.61	23	19.5	0.87	83.3805	115.3	26.38	0.0683437
Year 2	IRRI 152	4	33.1	1.14	7.35	4.5034	0.54	168.985	41.5662	5.97704	139	76	95	370.1	22	15.5	0.9	66.3	81	54.3	0.127945
Year 2	IRRI 152	5	16.2	0.67	6.89	2.35123	0.471	149.076	41.4237	5.82445	145.8	83	133.7	435.94	28.5	14.5	0.645	76.5	80	55.4	0.112753
Year 2	IRRI 154	1	29	0.74	10.9	2.66055	0.529	216.285	54.2202	7.84172	137	65	74	185.8	21.5	11.5	1.315	77.6	98.5	67.5	0.266482
Year 2	IRRI 154	2	39.2	2.01	14	2.8	0.564	189.397	41.0835	6.24109	145	82	84	294.25	24.5	12	2.35	67.2	103.5	108	0.26849
Year 2	IRRI 154	3	24.9	0.807	10.9	2.2844	0.582	132.41	46.7849	7.4512	150	57	78	130.2	22	11.5	1.3	70	97.5	53.31	0.290502
Year 2	IRRI 154	4	29.1	1.29	10.1	2.88119	0.485	213.042	38.3954	4.84257	128	51	82	159.75	22.5	12	1.64	85.9083	91	59.66	0.271911
Year 2	IRRI 154	5	20.1	0.701	7.25	2.77241	0.418	139.016	46.1858	6.30157	113	101	76	221.12	25.5	11.5	1.85	84.7	99.5	77.6	0.259775
Year 2	IRRI 157	1	30.5	1.23	12	2.54167	0.56	201.727	43.0886	6.97405	119.4	76	90.7	352.3	15	8	0.81	55.4	70	65.3	0.15637
Year 2	IRRI 157	2	39.1	1.26	12.8	3.05469	0.516	154.666	31.012	4.66296	98.5	114	89.7	553.34	13.2	10.2	0.9	65.4	76.4	44.3	0.0741249
Year 2	IRRI 157	3	26.7	0.987	10.8	2.47222	0.571	158.957	55.2578	9.60652	119	56.5	59.7	203.75	14.5	7.5	0.56	37.8598	65	44.37	0.178825
Year 2	IRRI 157	4	11.9	0.649	9.92	3.03571	0.549	161.795	42.3597	6.0078	142.6	92	84.5	478.54	12.4	9.33	1.11	45.3	49.5	55.54	0.103992
Year 2	IRRI 157	5	18.8	0.361	6.91	2.72069	0.38	96.619	56.4604	8.32715	123.3	64	72.4	307.42	23.3	10.3	0.98	55.4	55.4	44.3	0.125952
Year 2	MIL 240	1	21.3	0.675	9.57	2.22571	0.536	138.094	34.4268	5.57685	108	34	89	123.27	26.84	13.5	1.59	81	115.5	65.8	0.348019
Year 2	MIL 240	2	29.4	1.24	12.3	2.39024	0.488	188.744	29.6861	4.64074	112	33	94	156.49	28	10.5	2.2	83.6667	123.5	61.39	0.281761
Year 2	MIL 240	3	36	1.01	12.4	2.90323	0.426	115.71	36.7214	5.43697	114	71	95	210.88	27.5	13	1.7	89.2477	115.5	105.79	0.33407
Year 2	MIL 240	4	19.1	0.354	6.73	2.83804	0.469	128.536	36.1077	5.42133	108	54	87	155.47	22.5	9.5	1.75	85.099	105	51.34	0.248247
Year 2	MIL 240	5	29.1	0.493	9.7	3	0.647	119.037	43.1949	7.01878	117	36	85	141.96	28	10	1.7	79.7	113.5	77.8	0.354023
Year 2	MTU1010	1	25	0.979	11.6	2.15517	0.461	164.064	27.2385	2.80033	118	55	78	133.41	24	14	2.365	74.2611	119.5	73.8	0.35616
Year 2	MTU1010	2	35	1.02	11.9	2.94118	0.533	115.038	34.7173	5.27202	143	100	113	408.93	11	9.8	1.2	66.5	88.9	36.32	0.0815722
Year 2	MTU1010	3	24.9	0.644	10.6	2.34906	0.393	140.609	44.6724	6.28915	134	42	68	103.74	23	13	2.365	88.0741	119.5	38.37	0.270002
Year 2	MTU1010	4	29.5	0.724	8.95	3.29609	0.409	177.585	42.4195	6.55657	146	64	93	237.63	25.5	10.5	1.87	36	122	40.03	0.144169
Year 2	MTU1010	5	23.1	0.374	8.15	2.83436	0.525	125.825	36.371	7.17388	10	94	88.7	492.46	12.2	10.2	1.1	37.5	65.4	56.9	0.103575
Year 2	PALMAR 18	1	26	1.61	13.2	1.9697	0.586	149.305	37.0561	6.16817	120	73	88	229.14	26.5	10	1.965	84.0171	109	110.77	0.32588
Year 2	PALMAR 18	2	33.7	2.02	14.6	2.30822	0.556	180.94	35.1209	6.29036	121	47	90	160.64	25.25	11	2.575	87.3964	129	88.77	0.35592
Year 2	PALMAR 18	3	30.6	1.69	13.1	2.33588	0.561	169.857	30.3316	5.24698	123	61	89	193.83	26.5	10	1.965	88.3396	111	112.16	0.366548
Year 2	PALMAR 18	4	21.2	0.757	9.45	2.84564	0.542	159.066	36.0421	6.12987	114	85	89	230.36	28.5	14	4.43	81	188	144.04	0.384722
Year 2	PALMAR 18	5	23.6	0.725	8.62	2.73782	0.392	156.41	30.3033	4.51936	133	93	78	257.34	26	10	2.075	93.5	119	88.7	0.256329
Year 2	WAB 56-125	1	38.2	2.24	11.5	3.32174	0.472	121.042	41.8814	7.83554	147	67	116	285.32	23	12	0.9	65.7	73	16.5	0.0546683
Year 2	WAB 56-125	2	38.9	2.06	14.8	2.62838	0.559	218.051	40.1192	6.61571	148	39	108	206.08	27	11.5	2.1	52.0619	106	37.68	0.154578
Year 2	WAB 56-125	3	27.6	0.956	11.6	2.37931	0.516	204.485	36.2738	5.35892	154	55.6	100	133.91	22.25	12	0.83	67.1707	73	24.07	0.152361
Year 2	WAB 56-125	4	29.3	0.702	11.8	2.48305	0.639	167.809	42.4174	6.16827	137	50	93	202.86	26.5	14.5	1.07	65.073	72.5	30.04	0.128982
Year 2	WAB 56-125	5	31.4	0.689	11.5	2.73043	0.387	128.479	43.5718	3.44343	154	44	92	181.24	27.5	12.5	1.6	56.4	96	20.99	0.103793
Year 2	Thad	1	29	1.58	11.3	2.56637	0.583	204.066	26.1955	4.66685	97	18	76	111.13	24.5	14.5	3.035	79.4348	143	42.09	0.274703
Year 2	Thad	2	34.3	2.25	14	2.45	0.548	181.378	26.7144	3.8941	105	11	78	67.33	26.25	14	3.155	82.5888	154.5	18.26	0.213343
Year 2	Thad	3	33.5	1.59	14	2.39286	0.52	159.544	29.2124	5.36466	108	16	70	78.31	24.25	14.5	3.035	77.4	143	34.6	0.306439
Year 2	Thad	4	25.3	0.353	8	3.1625	0	144.6	50.0572	8.09445	97	29	78	117.01	24.5	14	3.22	85	154	65.31	0.358216
Year 2	Thad	5	30.9	0.819	12.6	2.45238	0.548	167.067	50.862	8.27811	107	22	77	136.79	26.5	13.5	2.655	69.78	144.5	44.4	0.245047
Year 2	Rex	1	35.9	1.34	13.3	2.69925	0.44	185.796	33.448	6.29838	100	16.5	80	97.86	20.5	12	2.02	77.5	110	55.4	0.361477
Year 2	Rex	2	28.2	2.3	14.1	2	0.635	148.099	40.2911	6.10931	104	17	92	122.89	21	13	3.055	85.5946	141	43.97	0.263514
Year 2	Rex	3	36.3	1.92	13.1	2.77099	0.598	110.151	26.7652	5.5	112	23.3	74	65.86	20.5	12	2.02	91	110	43.4	0.397218
Year 2	Rex	4	38.1	1.02	14.1	2.70213	0.54	166.767	58.4351	9.25601	96	22	89	123.46	21.5	12.5	1.4	83	269	50.71	0.291152
Year 2	Rex	5	28.6	0.535	10.4	2.75	0.425	155.422	35.6475	6.76515	107	17	75	128.94	22	12	2.555	73.5	131	44.3	0.255715
